# Supplementary material for: Predicting dielectric constants of pure liquids: fragment-based Kirkwood–Fröhlich model applicable over a wide range of polarity
Source: Royal Society of Chemistry journal article supplement (doi:10.1039/c9cp01704f), 2019-01-01
Supplement: c9cp01704f3.xlsx [file c9cp01704f3.xlsx]

## Sheet: Table S1
Compound	CAS registry number	Temperature (°C)	Estimated molar volume Vm (cm3/mol)	Estimated refractive index nD	Experimental gm2 (D2)	Dielectric constant DC (LOO)	Dielectric constant DC (calc.)	Source (*)
TRAINING SET
Alkanes
Propane	74-98-6	20	75.73	1.34489	-0.107469	1.80872	1.81	Handbook 2017
Butane	106-97-8	22	92.3	1.3661	-0.087963	1.86624	1.87	Handbook 2017
Isobutane (2-Methylpropane)	75-28-5	22	93.2	1.36255	-0.099044	1.85655	1.86	Handbook 2017
Pentane	109-66-0	20	108.87	1.38105	-0.070132	1.90729	1.91	Handbook 2017
Isopentane (2-Methylbutane)	78-78-4	20	109.77	1.37788	-0.051072	1.89855	1.9	Handbook 2017
Neopentane (2,2-Dimethylpropane)	463-82-1	23	109.92	1.38165	-0.149647	1.90896	1.91	Handbook 2017
Hexane	110-54-3	20	125.44	1.39214	-0.056597	1.93805	1.94	Handbook 2017
Isohexane (2-Methylpentane)	107-83-5	20	126.34	1.38929	-0.047715	1.93011	1.93	Handbook 2017
3-Methylpentane	96-14-0	20	126.34	1.38929	-0.047715	1.93011	1.93	Handbook 2017
Neohexane (2,2-Dimethylbutane)	75-83-2	20	126.49	1.39258	-0.082543	1.93927	1.94	Handbook 2017
Diisopropyl (2,3-Dimethylbutane)	79-29-8	20	127.24	1.38648	-0.038818	1.92232	1.92	Handbook 2017
Heptane	142-82-5	20	142.01	1.4007	-0.05522	1.96196	1.96	Handbook 2017
2-Methylhexane	591-76-4	20	142.91	1.39811	-0.046074	1.95471	1.95	Handbook 2017
3-Methylhexane	589-34-4	20	142.91	1.39811	-0.046074	1.95471	1.95	Handbook 2017
2,2-Dimethylpentane	590-35-2	20	143.06	1.40103	-0.056829	1.96288	1.96	Handbook 2017
2,3-Dimethylpentane	565-59-3	20	143.81	1.39555	-0.023486	1.94757	1.95	Handbook 2017
2,4-Dimethylpentane	108-08-7	20	143.81	1.39555	-0.063923	1.94757	1.95	Handbook 2017
3,3-Dimethylpentane	562-49-2	18	143.06	1.40103	-0.030012	1.96288	1.96	Handbook 2017
3-Ethylpentane	617-78-7	20	142.91	1.39811	-0.019457	1.95471	1.95	Handbook 2017
Triptane (2,2,3-Trimethylbutane)	464-06-2	20	143.96	1.39845	-0.034256	1.95567	1.96	Handbook 2017
Octane	111-65-9	20	158.58	1.40751	-0.045155	1.98109	1.98	Handbook 2017
2-Methylheptane	592-27-8	20	159.48	1.40514	-0.035745	1.97442	1.97	Handbook 2017
2,2-Dimethylhexane	590-73-8	20	159.63	1.40776	-0.046472	1.98179	1.98	Handbook 2017
Biisobutyl (2,5-Dimethylhexane)	592-13-2	21	160.38	1.4028	-0.011583	1.96784	1.97	Handbook 2017
3,3-Dimethylhexane	563-16-6	20	159.63	1.40776	-0.031799	1.98179	1.98	Handbook 2017
3,4-Dimethylhexane	583-48-2	19	160.38	1.4028	0.017795	1.96784	1.97	Handbook 2017
3-Ethylhexane	619-99-8	20	159.48	1.40514	-0.021068	1.97442	1.97	Handbook 2017
3-Ethyl-3-methylpentane	1067-08-9	18	159.63	1.40776	0.011837	1.98179	1.98	Handbook 2017
2-tert-Butylbutane (2,2,3-Trimethylpentane)	564-02-3	20	160.53	1.4054	-0.022289	1.97515	1.98	Handbook 2017
Isooctane (2,2,4-Trimethylpentane)	540-84-1	20	160.53	1.4054	-0.051883	1.97515	1.98	Handbook 2017
2,3,3-Trimethylpentane	560-21-4	20	160.53	1.4054	0.007102	1.97515	1.98	Handbook 2017
2,3,4-Trimethylpentane	565-75-3	20	161.28	1.40048	0.012811	1.96136	1.96	Handbook 2017
Nonane	111-84-2	20	175.15	1.41306	-0.042514	1.99673	2	Handbook 2017
2-Methyloctane	3221-61-2	20	176.05	1.41087	-0.032927	1.99055	1.99	Handbook 2017
4-Methyloctane	2216-34-4	20	176.05	1.41087	-0.032927	1.99055	1.99	Handbook 2017
2,4-Dimethylheptane	2213-23-2	20	176.95	1.40871	-0.154571	1.98446	1.98	Handbook 2017
2,5-Dimethylheptane	2216-30-0	20	176.95	1.40871	-0.154571	1.98446	1.98	Handbook 2017
2,6-Dimethylheptane	1072-05-5	20	176.95	1.40871	0.008902	1.98446	1.98	Handbook 2017
Decane	124-18-5	20	191.72	1.41766	-0.034137	2.00976	2.01	Handbook 2017
2,7-Dimethyloctane	1072-16-8	20	193.52	1.41363	-0.03217	1.99835	2	Handbook 2017
4-Propylheptane	3178-29-8	20	192.62	1.41563	-0.006978	2.00402	2	Handbook 2017
Undecane	1120-21-4	20	208.29	1.42154	-0.038803	2.02078	2.02	Handbook 2017
Dodecane	112-40-3	20	224.86	1.42486	-0.04058	2.03023	2.03	Handbook 2017
Tridecane	629-50-5	20	241.43	1.42773	-0.039487	2.03842	2.04	Handbook 2017
5-Butylnonane	17312-63-9	20	242.33	1.42607	-0.007916	2.03368	2.03	Handbook 2017
Tetradecane	629-59-4	20	258	1.43024	-0.035551	2.04558	2.05	Handbook 2017
Pentadecane	629-62-9	20	274.57	1.43244	-0.028784	2.0519	2.05	Handbook 2017
Hexadecane	544-76-3	20	291.14	1.4344	-0.019206	2.05751	2.06	Handbook 2017
Heptadecane	629-78-7	20	307.71	1.43615	-0.006829	2.06254	2.06	Handbook 2017
Nonadecane	629-92-5	20	340.85	1.43915	-0.003407	2.07115	2.07	Handbook 2017
Docosane	629-97-0	20	390.56	1.4427	-0.004645	2.08137	2.08	Handbook 2017
Triacontane	638-68-6	100	523.12	1.44888	-1.11874	2.09926	2.1	Handbook 2017
Squalane (2,6,10,15,19,23-Hexamethyltetracosane)	111-01-3	100	528.52	1.44403	-1.05122	2.08523	2.09	Handbook 2017
6-Pentylundecane	7249-32-3	20	292.04	1.433	-0.008945	2.05348	2.05	Volume 6 - 54A3
7-Hexyltridecane	7225-66-3	20	341.75	1.43793	0.00702	2.06765	2.07	Volume 6 - 54A3
8-Heptylpentadecane	71005-15-7	20	391.46	1.44162	0.073585	2.07827	2.08	Volume 6 - 54A3
9-Octylheptadecane	7225-64-1	20	441.17	1.44449	0.089131	2.08655	2.09	Volume 6 - 54C1
10-Nonylnonadecane	699012-34-5	20	490.88	1.44678	0.028868	2.09317	2.09	Volume 6 - 54C1
11-Decylheneicosane	55320-06-4	20	540.59	1.44865	0.145261	2.09859	2.1	Volume 6 - 54C1
12-Undecyltricosane	850645-69-1	20	590.3	1.45021	0.034867	2.10311	2.1	Volume 6 - 54C1
13-Dodecylpentaeicosane	83480-53-9	20	640.01	1.45153	0.07148	2.10693	2.11	Volume 6 - 54C1
Cyclopentane	287-92-3	20	92.26	1.41289	-0.021993	1.99625	2	Handbook 2017
Ethylcyclopropane	1191-96-4	20	94.64	1.40152	-0.029965	1.96426	1.96	Handbook 2017
Cyclohexane	110-82-7	20	106.31	1.43247	-0.030042	2.05196	2.05	Handbook 2017
Methylcyclopentane	96-37-7	20	109.73	1.41744	-0.018923	2.00913	2.01	Handbook 2017
Ethylcyclobutane	4806-61-5	20	111.21	1.41112	-0.021517	1.99127	1.99	Handbook 2017
Cycloheptane	291-64-5	20	119.74	1.45034	-0.024217	2.10349	2.1	Handbook 2017
Methylcyclohexane	108-87-2	20	123.78	1.43377	-0.039025	2.0557	2.06	Handbook 2017
Cyclooctane	292-64-8	22	136.31	1.45239	0.012376	2.10944	2.11	Handbook 2017
Pinane	473-55-2	25	168.1	1.43723	0.124375	2.06562	2.07	Handbook 2017
cis-Decahydronaphthalene (cis-Decalin)	493-01-6	20	155.26	1.4756	0.054383	2.1774	2.18	Handbook 2017
trans-Decahydronaphthalene (trans-Decalin)	493-02-7	20	155.26	1.4756	0.003341	2.1774	2.18	Handbook 2017
Alkenes
Ethylene (Ethene)	74-85-1	-3	54.34	1.31936	-0.142638	1.74071	1.74	Handbook 2017
cis-2-Butene	590-18-1	23	85.62	1.40051	-0.001148	1.96144	1.96	Handbook 2017
Isobutene (2-Methyl-1-propene)	115-11-7	16	86.33	1.38027	0.167376	1.90516	1.91	Handbook 2017
1-Pentene	109-67-1	20	103.12	1.39948	0.048482	1.95854	1.96	Handbook 2017
2-Methyl-1-butene	563-46-2	20	102.9	1.39393	0.218269	1.94303	1.94	Handbook 2017
2-Methyl-2-butene	513-35-9	23	101.97	1.4055	0.00429	1.97544	1.98	Handbook 2017
1-Hexene	592-41-6	21	119.69	1.40867	0.102886	1.98435	1.98	Handbook 2017
trans-2-Hexene	4050-45-7	22	118.76	1.41883	-0.03565	2.01307	2.01	Handbook 2017
cis-3-Hexene	7642-09-3	23	118.76	1.41883	0.060685	2.01307	2.01	Handbook 2017
trans-3-Hexene	13269-52-8	20	118.76	1.41883	-0.067882	2.01307	2.01	Handbook 2017
1-Heptene	592-76-7	20	136.26	1.41567	0.103961	2.00411	2	Handbook 2017
2-Methyl-2-hexene	2738-19-4	20	135.11	1.4204	1.0183	2.01754	2.02	Handbook 2017
3-Ethyl-2-pentene	816-79-5	20	135.11	1.4204	0.039024	2.01754	2.02	Handbook 2017
1-Octene	111-66-0	20	152.83	1.42117	0.121538	2.01973	2.02	Handbook 2017
cis-3-Octene	14850-22-7	25	151.9	1.42925	0.023465	2.04276	2.04	Handbook 2017
trans-3-Octene	14919-01-8	25	151.9	1.42925	-0.058784	2.04276	2.04	Handbook 2017
cis-4-Octene	7642-15-1	25	151.9	1.42925	0.009869	2.04276	2.04	Handbook 2017
trans-4-Octene	14850-23-8	25	151.9	1.42925	-0.058784	2.04276	2.04	Handbook 2017
cis-3-Methyl-2-heptene	22768-19-0	20	151.68	1.42545	0.519205	2.0319	2.03	Handbook 2017
2,4,4-Trimethyl-1-pentene	107-39-1	25	153.66	1.41759	0.111459	2.00957	2.01	Handbook 2017
2,5-Dimethyl-2-hexene	3404-78-2	20	152.58	1.42283	0.521022	2.02444	2.02	Handbook 2017
1-Nonene	124-11-8	20	169.4	1.42561	0.21708	2.03237	2.03	Handbook 2017
1-Decene	872-05-9	20	185.97	1.42928	0.157243	2.04283	2.04	Handbook 2017
cis-5-Decene	7433-78-5	25	185.04	1.43599	0.013072	2.06205	2.06	Handbook 2017
trans-5-Decene	7433-56-9	25	185.04	1.43599	-0.053069	2.06205	2.06	Handbook 2017
5-Methyl-4-nonene	15918-07-7	20	184.82	1.43285	0.202212	2.05307	2.05	Handbook 2017
2,4,6-Trimethyl-3-heptene	126690-66-2	20	186.62	1.42848	0.396784	2.04056	2.04	Handbook 2017
1-Undecene	821-95-4	20	202.54	1.43234	0.155316	2.05161	2.05	Handbook 2017
1-Dodecene	112-41-4	20	219.11	1.43495	0.172107	2.0591	2.06	Handbook 2017
1-Tridecene	2437-56-1	20	235.68	1.4372	0.151511	2.06555	2.07	Handbook 2017
4-Ethyl-3-heptene	33933-74-3	20	168.25	1.42951	0.610582	2.0435	2.04	Volume 6 - 49L1
2,6-Dimethyl-2-heptene	5557-98-2	20	169.15	1.42712	0.796491	2.03667	2.04	Volume 6 - 49L1
3,6-Dimethyl-3-heptene	62685-72-7	20	169.15	1.42712	0.435042	2.03667	2.04	Volume 6 - 49L1
Cyclopentene	142-29-0	22	85.58	1.45229	-0.021584	2.10915	2.11	Handbook 2017
Cyclohexene	110-83-8	20	99.63	1.46809	0.053393	2.15529	2.16	Handbook 2017
Cycloheptene	628-92-2	22	113.06	1.48319	0.064697	2.19985	2.2	Handbook 2017
cis-Cyclooctene	931-87-3	23	129.63	1.48114	0.122857	2.19379	2.19	Handbook 2017
1,2-Dimethylcyclohexene	1674-10-8	23	132.33	1.45906	0.012591	2.12886	2.13	Handbook 2017
1,3-Dimethylcyclohexene	2808-76-6	23	133.45	1.46014	0.054323	2.13201	2.13	Handbook 2017
alpha-Pinene	80-56-8	25	160.3	1.45849	0.072404	2.12719	2.13	Handbook 2017
beta-Pinene	127-91-3	25	161.23	1.4505	0.527435	2.10394	2.1	Handbook 2017
Carene	13466-78-9	25	153.41	1.48257	0.00252	2.19803	2.2	Volume 6 - 54T2
Allene	463-49-0	-4	64.23	1.37691	0.073594	1.89588	1.9	Handbook 2017
1,3-Butadiene (Divinyl)	106-99-0	-8	80.8	1.41095	0.038863	1.99078	1.99	Handbook 2017
Isoprene (2-Methyl-1,3-butadiene)	78-79-5	20	97.15	1.41446	0.085676	2.00069	2	Handbook 2017
cis-1,3-Pentadiene	1574-41-0	25	96.44	1.43311	0.220657	2.0538	2.05	Handbook 2017
1,4-Pentadiene	591-93-5	21	97.37	1.42038	0.028287	2.01747	2.02	Handbook 2017
1,5-Hexadiene	592-42-7	21	113.94	1.4271	0.093242	2.03661	2.04	Handbook 2017
cis,cis-2,4-Hexadiene	6108-61-8	24	112.08	1.44931	0.057533	2.10049	2.1	Handbook 2017
trans,trans-2,4-Hexadiene	5194-51-4	24	112.08	1.44931	0.01898	2.10049	2.1	Handbook 2017
cis-2-Methyl-1,3-pentadiene	1501-60-6	25	112.79	1.43294	0.351049	2.05331	2.05	Handbook 2017
3-Methyl-1,3-pentadiene	4549-74-0	25	112.79	1.43294	0.360181	2.05331	2.05	Handbook 2017
4-Methyl-1,3-pentadiene	926-56-7	20	112.79	1.43294	0.503981	2.05331	2.05	Handbook 2017
Diisopropenyl (2,3-Dimethyl-1,3-butadiene)	513-81-5	20	113.5	1.41696	0.092736	2.00777	2.01	Handbook 2017
1,6-Heptadiene	3070-53-9	20	130.51	1.43213	0.123062	2.05101	2.05	Handbook 2017
1,7-Octadiene	3710-30-3	20	147.08	1.43605	0.161241	2.06224	2.06	Handbook 2017
1,3,5-Hexatriene	2235-12-3	23.8	107.26	1.45968	0.134306	2.13068	2.13	Volume 6 - 86G1
2,6-Dimethyl-2,4,6-octatriene	673-84-7	25	171.24	1.47096	0.545202	2.16372	2.16	Volume 6 - 54T2
Tetratriacontadiene	80961-14-4	25	576.97	1.4615	3.11435	2.13599	2.14	Volume 6 - 35D1
1,4-Cyclohexadiene	628-41-1	23	92.95	1.51001	-0.052453	2.28012	2.28	Handbook 2017
Dicyclopentadiene	1755-01-7	40	132.13	1.54414	0.04809	2.38436	2.38	Handbook 2017
alpha-Terpinene	99-86-5	25	159.69	1.48168	0.327526	2.19538	2.2	Handbook 2017
gamma-Terpinene	99-85-4	25	159.69	1.48168	0.098345	2.19538	2.2	Handbook 2017
Terpinolene	586-62-9	25	158.57	1.48092	0.126507	2.19312	2.19	Handbook 2017
d-Limonene	5989-27-5	25	160.62	1.47338	0.262472	2.17086	2.17	Handbook 2017
l-Limonene	5989-54-8	25	160.62	1.47338	0.262472	2.17086	2.17	Handbook 2017
beta-Myrcene	123-35-3	25	173.1	1.45584	0.263377	2.11947	2.12	Handbook 2017
Benzene derivatives
Benzene	71-43-2	20	88.09	1.51953	-0.019941	2.30898	2.31	Handbook 2017
Toluene (Methylbenzene)	108-88-3	23	104.44	1.51551	0.067889	2.29676	2.3	Handbook 2017
Ethylbenzene	100-41-4	20	121.01	1.5088	0.161887	2.27647	2.28	Handbook 2017
o-Xylene (1,2-Dimethylbenzene)	95-47-6	20	120.79	1.51258	0.248994	2.2879	2.29	Handbook 2017
m-Xylene (1,3-Dimethylbenzene)	108-38-3	20	120.79	1.51258	0.067708	2.2879	2.29	Handbook 2017
p-Xylene (1,4-Dimethylbenzene)	106-42-3	20	120.79	1.51258	-0.017021	2.2879	2.29	Handbook 2017
Propylbenzene (Isocumene)	103-65-1	20	137.58	1.50373	0.117218	2.2612	2.26	Handbook 2017
Isopropylbenzene (Cumene)	98-82-8	20	138.48	1.50015	0.140782	2.25046	2.25	Handbook 2017
2-Ethyltoluene	611-14-3	20	137.36	1.50703	0.342487	2.27115	2.27	Handbook 2017
3-Ethyltoluene	620-14-4	20	137.36	1.50703	0.10599	2.27115	2.27	Handbook 2017
4-Ethyltoluene	622-96-8	20	137.36	1.50703	-0.001246	2.27115	2.27	Handbook 2017
1,2,3-Trimethylbenzene (Hemimellitene)	526-73-8	20	137.14	1.51035	0.38989	2.28117	2.28	Handbook 2017
1,2,4-Trimethylbenzene (Pseudocumene)	95-63-6	20	137.14	1.51035	0.10531	2.28117	2.28	Handbook 2017
1,3,5-Trimethylbenzene (Mesitylene)	108-67-8	20	137.14	1.51035	-0.00126	2.28117	2.28	Handbook 2017
o-Diethylbenzene	135-01-3	20	153.93	1.50269	0.389518	2.25809	2.26	Handbook 2017
m-Diethylbenzene	141-93-5	20	153.93	1.50269	0.135033	2.25809	2.26	Handbook 2017
p-Diethylbenzene	105-05-5	20	153.93	1.50269	0.002338	2.25809	2.26	Handbook 2017
Butylbenzene	104-51-8	20	154.15	1.49976	0.134349	2.24929	2.25	Handbook 2017
Isobutylbenzene	538-93-2	20	155.05	1.4966	0.098723	2.23981	2.24	Handbook 2017
sec-Butylbenzene	36383-15-0	20	155.05	1.4966	0.147154	2.23981	2.24	Handbook 2017
tert-Butylbenzene	98-06-6	20	155.2	1.49939	0.136673	2.24818	2.25	Handbook 2017
1-Ethyl-3,5-dimethylbenzene	934-74-7	20	153.71	1.50564	0.015869	2.26696	2.27	Handbook 2017
1,2,3,4-Tetramethylbenzene	488-23-3	23	153.49	1.5086	0.31225	2.27588	2.28	Handbook 2017
1,2,4,5-Tetramethylbenzene (Durene)	95-93-2	83	153.49	1.5086	-0.082996	2.27588	2.28	Handbook 2017
1-Isopropyl-4-methylbenzene (p-Cymene)	99-87-6	25	154.83	1.4995	-0.023386	2.24851	2.25	Handbook 2017
Pentamethylbenzene	700-12-9	61	169.84	1.50719	0.133699	2.27163	2.27	Handbook 2017
1,3-Diethyl-5-methylbenzene	2050-24-0	20	170.28	1.50186	0.005997	2.25558	2.26	Handbook 2017
Hexylbenzene	1077-16-3	20	187.29	1.49396	0.101819	2.2319	2.23	Handbook 2017
1,3,5-Triethylbenzene	102-25-0	20	186.85	1.49876	0.020505	2.24627	2.25	Handbook 2017
Heptylbenzene	1078-71-3	20	203.86	1.49177	0.05681	2.22537	2.23	Handbook 2017
Octylbenzene	2189-60-8	20	220.43	1.48991	0.071377	2.21983	2.22	Handbook 2017
1,2,3,4-Tetrahydronaphthalene (Tetralin)	119-64-2	25	134.8	1.55398	0.345323	2.41485	2.41	Handbook 2017
3-(2-Methyl-2-propyl)-1-methyl-butylbenzene	1075-38-3	20	171.55	1.49888	0.113144	2.24664	2.25	Volume 6 - 54A2
4-(2-Methyl-2-propyl)-1-methyl-butylbenzene	98-51-1	20	171.55	1.49888	0.004616	2.24664	2.25	Volume 6 - 54A2
Styrene (Vinylbenzene)	100-42-5	20	115.26	1.53368	0.10189	2.35217	2.35	Handbook 2017
Allylbenzene (2-Propenylbenzene)	300-57-2	20	131.83	1.52515	0.29724	2.32608	2.33	Handbook 2017
1-Propenylbenzene	637-50-3	20	130.9	1.53605	0.351868	2.35946	2.36	Handbook 2017
Isopropenylbenzene (alpha-Methyl styrene)	98-83-9	20	131.61	1.52061	-0.03312	2.31225	2.31	Handbook 2017
4-Ethylstyrene	3454-07-7	25	148.18	1.52168	1.08443	2.3155	2.32	Handbook 2017
Biphenyl (Diphenyl)	92-52-4	75	149.72	1.60493	-0.056496	2.57579	2.58	Handbook 2017
Diphenylmethane	101-81-5	30	166.29	1.59054	0.012295	2.52983	2.53	Handbook 2017
1,2-Diphenylethane (Dibenzyl)	103-29-7	58	182.86	1.57888	-0.033906	2.49287	2.49	Handbook 2017
Triphenylmethane	519-73-3	94	229.04	1.62352	-0.346944	2.63581	2.64	Handbook 2017
3,3-Dimethyldiphenyl	612-75-9	25	182.42	1.58434	0.012974	2.51014	2.51	Volume 6 - 51M1
Naphthalene	91-20-3	90	123.26	1.60832	-0.049248	2.5867	2.59	Handbook 2017
1-Methylnaphthalene	90-12-0	20	139.61	1.59441	0.353315	2.54213	2.54	Handbook 2017
2-Methylnaphthalene	91-57-6	40	139.61	1.59441	0.211513	2.54213	2.54	Handbook 2017
1,6-Dimethylnaphthalene	575-43-9	20	155.96	1.58351	0.239915	2.50751	2.51	Handbook 2017
Alkynes
Propyne (Methylacetylene)	74-99-7	-27	62.24	1.37743	0.567197	1.89731	1.9	Handbook 2017
1-Hexyne (Butylacetylene)	693-02-7	23	111.95	1.41662	0.575111	2.0068	2.01	Handbook 2017
Phenylacetylene (Ethynylbenzene)	536-74-3	25	107.52	1.55228	0.433696	2.40957	2.41	Handbook 2017
Pyrazines
Pyrazine (1,4-Diazine)	290-37-9	50	76.47	1.50602	0.33292	2.65238	2.71	Handbook 2017
2,5-Dimethylpyrazine	123-32-0	20	109.17	1.50241	0.15499	2.66396	2.59	Handbook 2017
2,6-Dimethylpyrazine	108-50-9	35	109.17	1.50241	0.341357	2.56442	2.58	Handbook 2017
Borates
Trimethyl borate	121-43-7	20	115.1	1.35021	0.484895	2.32982	2.32	Handbook 2017
Tributyl borate	688-74-4	20	264.23	1.41509	0.523486	2.21574	2.23	Handbook 2017
Trihexyl borate	5337-36-0	20	363.65	1.42916	0.555167	2.19912	2.21	Handbook 2017
Silanes
Tetramethylsilane (TMS)	75-76-3	20	127.6	1.37688	0.029272	2.02774	2	Handbook 2017
Tetraethylsilane	631-36-7	20	193.88	1.40713	0.19097	2.01362	2.05	Handbook 2017
Dimethyldipropylsilane	995-89-1	20	193.88	1.40713	0.122276	2.0263	2.05	Volume 6 - 55A2
Oxysilanes
Methoxytrimethylsilane	1825-61-2	25	133.85	1.37843	1.50311	3.00857	3.06	Volume 6 - 71N2
Trimethylpropoxysilane	1825-63-4	25	166.99	1.39562	1.27	2.91388	2.88	Volume 6 - 71N2
Trimethyl-2-propoxy silane	1825-64-5	25	167.89	1.39345	1.28835	2.89546	2.87	Volume 6 - 71N2
2-Butoxy trimethylsilane	1825-66-7	25	184.46	1.39992	1.19109	2.84006	2.8	Volume 6 - 71N2
Trimethyl-n-hexoxy silane	17888-62-9	25	216.7	1.41174	1.27112	2.7333	2.71	Volume 6 - 71N2
Dioxysilanes
Dimethyldi(1-propoxy)silane	5621-09-0	25	206.38	1.40733	1.71364	3.05465	3.03	Volume 6 - 71N2
Dimethyldi(2-propoxy)silane	5575-49-5	25	208.18	1.4037	1.8469	2.99434	3.01	Volume 6 - 71N2
Di-1-butoxydimethylsilane	1591-02-2	25	239.52	1.41547	1.65548	2.93029	2.91	Volume 6 - 71N2
Di-2-butoxydimethylsilane	5621-12-5	25	241.32	1.41226	1.92961	2.86948	2.89	Volume 6 - 71N2
Trioxysilanes
Tri-1-propoxymethylsilane	5581-66-8	25	245.77	1.41535	2.60923	3.27338	3.28	Volume 6 - 71N2
Tri-2-propoxymethylsilane	5581-67-9	25	248.47	1.41067	2.53308	3.2527	3.25	Volume 6 - 71N2
Tris(1-butoxy)methylsilane	5581-68-0	25	295.48	1.42395	2.62439	3.08263	3.09	Volume 6 - 71N2
Tris(2-butoxy)methylsilane	5581-69-1	25	298.18	1.41995	2.26758	3.09051	3.06	Volume 6 - 71N2
Tris(1-hexyloxy)methylsilane	18678-74-5	25	394.9	1.43473	2.52919	2.8478	2.84	Volume 6 - 71N2
Tetraoxysilanes
Tetramethoxysilane (Methyl silicate)	681-84-5	20	152.6	1.38232	4.55316	3.20016	4.24	Handbook 2017
Tetraethoxysilane (Ethyl silicate)	78-10-4	20	218.88	1.40751	0.963248	4.55688	3.6	Handbook 2017
Tetrapropoxysilane (Propyl silicate)	682-01-9	25	285.16	1.42117	2.70371	3.57416	3.23	Handbook 2017
Fluorobenzenes
Fluorobenzene	462-06-6	20	92.49	1.49215	1.94573	5.8222	5.72	Handbook 2017
2-Fluorotoluene	95-52-3	25	108.84	1.49243	1.50865	5.32108	5.09	Handbook 2017
3-Fluorotoluene	352-70-5	25	108.84	1.49243	2.28859	4.98225	5.09	Handbook 2017
4-Fluorotoluene	352-32-9	25	108.84	1.49243	2.59072	4.84747	5.09	Handbook 2017
Chlorobenzenes
Chlorobenzene	108-90-7	20	99.6	1.54834	1.97666	6.23248	6.09	Handbook 2017
2-Chlorotoluene	95-49-8	20	115.95	1.54054	1.71397	5.63747	5.46	Handbook 2017
3-Chlorotoluene	108-41-8	20	115.95	1.54054	2.38383	5.33405	5.46	Handbook 2017
4-Chlorotoluene	106-43-4	20	115.95	1.54054	2.69218	5.19123	5.46	Handbook 2017
Bromobenzenes
Bromobenzene	108-86-1	20	102.38	1.58309	1.75743	5.83199	5.74	Handbook 2017
2-Bromotoluene	95-46-5	20	118.73	1.57046	1.57649	5.27681	5.16	Handbook 2017
3-Bromotoluene	591-17-3	20	118.73	1.57046	2.17207	5.00655	5.16	Handbook 2017
4-Bromotoluene	106-38-7	20	118.73	1.57046	2.12798	5.02688	5.16	Handbook 2017
Primary amines
Ethylamine	75-04-7	0	63.96	1.38359	2.82043	6.28183	6.32	Handbook 2017
Propylamine	107-10-8	23	80.53	1.40041	1.85724	5.83015	5.16	Handbook 2017
Butylamine	109-73-9	20	97.1	1.41159	1.93055	5.17108	4.66	Handbook 2017
Pentylamine	110-58-7	20	113.67	1.41957	1.89163	4.70394	4.28	Handbook 2017
Hexylamine	111-26-2	20	130.24	1.42555	1.97247	4.3476	4	Handbook 2017
Heptylamine	111-68-2	20	146.81	1.4302	1.93286	4.08408	3.78	Handbook 2017
Octylamine	111-86-4	20	163.38	1.43391	1.87523	3.87557	3.6	Handbook 2017
Nonylamine	112-20-9	20	179.95	1.43695	1.84976	3.70524	3.46	Handbook 2017
Decylamine	2016-57-1	20	196.52	1.43948	1.8544	3.56404	3.34	Handbook 2017
Undecylamine	7307-55-3	20	213.09	1.44162	1.90724	3.44508	3.25	Handbook 2017
Dodecylamine	124-22-1	30	229.66	1.44346	1.81141	3.30014	3.12	Handbook 2017
Tetradecylamine	2016-42-4	39	262.8	1.44644	1.7683	3.11248	2.97	Handbook 2017
Pentadecylamine	2570-26-5	40	279.37	1.44766	1.76673	3.04836	2.91	Handbook 2017
Hexadecylamine	143-27-1	55	295.94	1.44876	1.60921	2.95101	2.83	Handbook 2017
Octadecylamine	124-30-1	53	329.08	1.45061	1.6502	2.87071	2.76	Handbook 2017
Anilines
Aniline	62-53-3	20	92.67	1.56944	2.41786	6.67153	6.73	Handbook 2017
2-Methylaniline	95-53-4	25	109.02	1.55785	2.42211	5.8668	5.86	Handbook 2017
3-Methylaniline	108-44-1	25	109.02	1.55785	2.23345	5.96333	5.86	Handbook 2017
4-Methylaniline	106-49-0	60	109.02	1.55785	1.98684	5.62602	5.47	Handbook 2017
Secondary amines
Diethylamine	109-89-7	20	100.04	1.4022	1.32957	3.24713	3.36	Handbook 2017
Dipropylamine	142-84-7	20	133.18	1.41811	0.973792	3.16816	3.05	Handbook 2017
Dibutylamine	111-92-2	20	166.32	1.42777	0.982328	2.9369	2.86	Handbook 2017
Dibenzylamine	103-49-1	20	190.6	1.59145	1.11993	3.49046	3.43	Handbook 2017
N-Anilines
N-Methylaniline	100-61-8	20	112.18	1.54024	2.43001	6.60232	6.39	Handbook 2017
N-Ethylaniline	103-69-5	20	128.75	1.53063	2.7806	5.59493	5.74	Handbook 2017
N-Propylaniline	622-80-0	20	145.32	1.52325	2.86966	5.12394	5.26	Handbook 2017
Tertiary amines
Trimethylamine	75-50-3	25	85.66	1.38577	0.395152	2.59486	2.57	Handbook 2017
Triethylamine	121-44-8	20	135.37	1.41515	0.479931	2.37577	2.43	Handbook 2017
Tripropylamine	102-69-2	20	185.08	1.42896	0.526865	2.3161	2.36	Handbook 2017
Tributylamine	102-82-9	20	234.79	1.43698	0.542307	2.28366	2.31	Handbook 2017
N,N-Anilines
N,N-Dimethylaniline	121-69-7	25	130.94	1.52535	2.18072	4.43011	4.65	Handbook 2017
N,N-Diethylaniline	91-66-7	30	164.08	1.51341	3.1018	3.73158	4.04	Handbook 2017
2-Methyl-N,N-dimethylaniline	609-72-3	20	147.29	1.52183	1.1062	4.63045	4.38	Handbook 2017
4-Methyl-N,N-dimethylaniline	99-97-8	20	147.29	1.52183	1.56377	4.46234	4.38	Handbook 2017
Ethers
Dimethyl ether	115-10-6	-15	65.41	1.32147	1.99928	5.6625	5.55	Handbook 2017
Diethyl ether	60-29-7	20	98.55	1.36888	1.84729	4.32272	4.12	Handbook 2017
Dipropyl ether	111-43-3	24	131.69	1.393	1.53339	3.77556	3.6	Handbook 2017
Diisopropyl ether	108-20-3	30	133.49	1.38759	2.03606	3.63525	3.51	Handbook 2017
Ethyl pentyl ether	17952-11-3	23	148.26	1.40111	1.91244	3.5653	3.44	Handbook 2017
Ethyl isopentyl ether	628-04-6	20	149.16	1.39862	2.29256	3.53436	3.43	Handbook 2017
Dibutyl ether	142-96-1	20	164.83	1.40762	1.45348	3.45829	3.32	Handbook 2017
Dipentyl ether	693-65-2	25	197.97	1.41743	1.29596	3.20825	3.1	Handbook 2017
Diisopentyl ether	544-01-4	20	199.77	1.41353	1.33924	3.19998	3.09	Handbook 2017
Cyclic ethers
Oxirane (Ethylene oxide)	75-21-8	20	50.28	1.34753	3.78284	9.65793	10.48	Handbook 2017
Tetrahydrofuran (Tetramethylene oxide)	109-99-9	22	81.94	1.40196	3.17198	8.06287	7.44	Handbook 2017
Tetrahydropyran (Oxane)	142-68-7	20	95.99	1.42511	2.43422	7.62076	6.82	Handbook 2017
Anisoles
Anisole (Methoxybenzene)	100-66-3	21	110.69	1.50935	1.49405	4.17787	4.2	Handbook 2017
2-Methylanisole	578-58-5	20	127.04	1.50737	1.08981	4.03083	3.93	Handbook 2017
3-Methylanisole	100-84-5	20	127.04	1.50737	1.46326	3.92276	3.93	Handbook 2017
4-Methylanisole	104-93-8	20	127.04	1.50737	1.41637	3.93656	3.93	Handbook 2017
Ethoxybenzene	103-73-1	20	127.26	1.5038	1.67537	3.83908	3.91	Handbook 2017
Thiols
Ethanethiol	75-08-1	25	72.29	1.43995	2.26549	6.85727	6.81	Handbook 2017
1-Propanethiol	107-03-9	15	88.86	1.445	2.27875	6.0596	6.04	Handbook 2017
2-Propanethiol	75-33-2	25	89.76	1.44029	2.40934	5.8022	5.81	Handbook 2017
1-Butanethiol	109-79-5	15	105.43	1.44848	2.2144	5.40515	5.38	Handbook 2017
2-Butanethiol	513-53-1	15	106.33	1.44446	2.54355	5.29929	5.32	Handbook 2017
2-Methyl-1-propanethiol	513-44-0	25	106.33	1.44446	2.16824	5.22648	5.2	Handbook 2017
2-Methyl-2-propanethiol	75-66-1	20	106.48	1.44845	2.45949	5.27457	5.28	Handbook 2017
1-Pentanethiol	110-66-7	20	122	1.45101	2.3276	4.86035	4.85	Handbook 2017
2-Methyl-2-butanethiol	1679-09-0	20	123.05	1.45097	2.53169	4.81791	4.83	Handbook 2017
1-Hexanethiol	111-31-9	20	138.57	1.45295	2.27527	4.51125	4.5	Handbook 2017
1-Heptanethiol	1639-09-4	20	155.14	1.45447	2.29109	4.23582	4.23	Handbook 2017
1-Octanethiol	111-88-6	20	171.71	1.4557	2.26234	4.0172	4.01	Handbook 2017
Sulfides
Dimethyl sulfide	75-18-3	21	74.06	1.44471	2.28313	7.53771	7.3	Handbook 2017
Diethyl sulfide	352-93-2	25	107.2	1.45165	2.66181	5.26681	5.55	Handbook 2017
Dibutyl sulfide	544-40-1	25	173.48	1.45759	2.69739	4.03751	4.16	Handbook 2017
Dipentyl sulfide	872-10-6	25	206.62	1.45914	2.57921	3.72098	3.81	Handbook 2017
Thiobenzenes
(Methylthio)benzene	100-68-5	30	119.34	1.58042	1.75711	5.25061	5.13	Handbook 2017
(Ethylthio)benzene	622-38-8	25	135.91	1.5661	2.09144	4.59783	4.72	Handbook 2017
4-Methyl-thioanisole	623-13-2	25	135.69	1.56971	1.91184	4.72519	4.75	Volume 6 - 75B4
Formates
Methyl formate	107-31-3	15	63.95	1.35055	3.35497	9.76784	9.57	Handbook 2017
Ethyl formate	109-94-4	15	80.52	1.37381	3.74047	7.96004	8.12	Handbook 2017
Propyl formate	110-74-7	30	97.09	1.38933	3.55772	6.82181	6.85	Handbook 2017
Butyl formate	592-84-7	30	113.66	1.40043	3.46435	6.1592	6.16	Handbook 2017
Pentyl formate	638-49-3	19	130.23	1.40876	3.4328	5.79448	5.79	Handbook 2017
Carboxylates
Methyl acetate	79-20-9	15	80.3	1.36675	2.99095	7.02643	6.99	Handbook 2017
Ethyl acetate	141-78-6	20	96.87	1.38345	2.93531	6.13489	6.1	Handbook 2017
Propyl acetate	109-60-4	20	113.44	1.39539	3.02053	5.54919	5.53	Handbook 2017
Butyl acetate	123-86-4	20	130.01	1.40435	2.93521	5.1106	5.09	Handbook 2017
Isobutyl acetate (2-Methylpropyl acetate)	110-19-0	20	130.91	1.40149	2.97324	5.06521	5.04	Handbook 2017
sec-Butyl acetate (1-Methylpropyl acetate)	105-46-4	20	130.91	1.40149	3.03353	5.0639	5.04	Handbook 2017
tert-Butyl acetate	540-88-5	20	131.06	1.40468	3.46892	5.07323	5.06	Handbook 2017
Pentyl acetate	628-63-7	20	146.58	1.41132	2.99314	4.76474	4.75	Handbook 2017
Isopentyl acetate	123-92-2	20	147.48	1.40873	2.96053	4.72902	4.71	Handbook 2017
Hexyl acetate	142-92-7	20	163.15	1.4169	2.89487	4.48981	4.47	Handbook 2017
Heptyl acetate	112-06-1	20	179.72	1.42147	2.89372	4.26391	4.25	Handbook 2017
Octyl acetate	112-14-1	15	196.29	1.42528	3.05221	4.11459	4.1	Handbook 2017
2-Methylheptyl acetate	74112-36-0	15	197.19	1.42325	3.19708	4.0914	4.08	Handbook 2017
Nonyl acetate	143-13-5	20	212.86	1.4285	2.90142	3.91779	3.9	Handbook 2017
Decyl acetate	112-17-4	20	229.43	1.43127	2.91905	3.78259	3.77	Handbook 2017
Dodecyl acetate	112-66-3	20	262.57	1.43576	3.03281	3.56422	3.55	Handbook 2017
Hexadecyl acetate	629-70-9	35	328.85	1.44205	2.94424	3.20032	3.19	Handbook 2017
Octadecyl acetate	822-23-1	35	361.99	1.44434	2.89199	3.09869	3.09	Handbook 2017
Cyclohexyl acetate	622-45-7	20	144.92	1.44752	2.99477	5.05118	5.03	Handbook 2017
l-Bornyl acetate	5655-61-8	30	200.11	1.46636	3.31543	4.19141	4.18	Handbook 2017
Methyl propanoate	554-12-1	20	96.87	1.38345	3.01191	6.13071	6.1	Handbook 2017
Ethyl propanoate	105-37-3	20	113.44	1.39539	3.12441	5.54564	5.53	Handbook 2017
Propyl propanoate	106-36-5	20	130.01	1.40435	3.08842	5.10714	5.09	Handbook 2017
Butyl propanoate	590-01-2	20	146.58	1.41132	3.0412	4.76399	4.75	Handbook 2017
Pentyl propanoate	624-54-4	20	163.15	1.4169	3.03474	4.48825	4.47	Handbook 2017
Isopentyl propanoate	105-68-0	0	164.05	1.41453	3.51663	4.65227	4.64	Handbook 2017
Cyclohexyl propanoate	6222-35-1	20	161.49	1.44954	3.0608	4.72842	4.71	Handbook 2017
Methyl butanoate	623-42-7	28	113.44	1.39539	2.99594	5.44422	5.42	Handbook 2017
Ethyl butanoate	105-54-4	28	130.01	1.40435	3.11159	5.01447	5	Handbook 2017
Propyl butanoate	105-66-8	20	146.58	1.41132	2.51742	4.7721	4.75	Handbook 2017
Ethyl 3-methylbutanoate	108-64-5	20	147.48	1.40873	2.95079	4.72917	4.71	Handbook 2017
Butyl butanoate	109-21-7	25	163.15	1.4169	2.91131	4.44335	4.43	Handbook 2017
Pentyl butanoate	540-18-1	28	179.72	1.42147	2.82503	4.19822	4.18	Handbook 2017
Isopentyl butanoate	106-27-4	20	180.62	1.41929	2.68193	4.24005	4.22	Handbook 2017
Cyclohexyl butanoate	1551-44-6	20	178.06	1.45118	3.09397	4.46807	4.45	Handbook 2017
Methyl pentanoate	624-24-8	20	130.01	1.40435	2.86687	5.11214	5.09	Handbook 2017
Ethyl pentanoate	539-82-2	18	146.58	1.41132	2.89617	4.78747	4.77	Handbook 2017
Propyl pentanoate	141-06-0	19	163.15	1.4169	2.42902	4.50446	4.48	Handbook 2017
Isobutyl pentanoate	10588-10-0	19	180.62	1.41929	2.42901	4.25055	4.23	Handbook 2017
Pentyl pentanoate	2173-56-0	32	196.29	1.42528	3.09661	3.98587	3.97	Handbook 2017
Isopentyl pentanoate	2050-09-1	19	197.19	1.42325	2.35493	4.06514	4.05	Handbook 2017
Isopentyl isopentanoate	659-70-1	15	198.09	1.42125	3.38157	4.0683	4.06	Handbook 2017
Methyl hexanoate	106-70-7	20	146.58	1.41132	2.8291	4.76729	4.75	Handbook 2017
Ethyl hexanoate	123-66-0	20	163.15	1.4169	2.92721	4.48945	4.47	Handbook 2017
Pentyl hexanoate	540-07-8	15	212.86	1.4285	3.33878	3.95177	3.94	Handbook 2017
Methyl heptanoate	106-73-0	20	163.15	1.4169	2.83006	4.49053	4.47	Handbook 2017
Methyl octanoate	111-11-5	20	179.72	1.42147	2.774	4.26489	4.25	Handbook 2017
Methyl nonanoate	1731-84-6	20	196.29	1.42528	2.79117	4.07677	4.06	Handbook 2017
Methyl undecanoate	1731-86-8	20	229.43	1.43127	2.79481	3.78306	3.77	Handbook 2017
Ethyl decanoate	110-38-3	20	229.43	1.43127	2.91905	3.78259	3.77	Handbook 2017
Ethyl undecanoate	627-90-7	20	246	1.43366	2.77525	3.66645	3.65	Handbook 2017
Methyl dodecanoate	111-82-0	20	246	1.43366	2.75843	3.6665	3.65	Handbook 2017
Ethyl dodecanoate	106-33-2	0	262.57	1.43576	3.3841	3.68522	3.67	Handbook 2017
Methyl tridecanoate	1731-88-0	20	262.57	1.43576	2.74556	3.56491	3.55	Handbook 2017
Methyl tetradecanoate	124-10-7	20	279.14	1.43761	2.72835	3.47572	3.47	Handbook 2017
Ethyl tetradecanoate	124-06-1	20	295.71	1.43926	3.17924	3.39604	3.39	Handbook 2017
Methyl pentadecanoate	7132-64-1	20	295.71	1.43926	2.77197	3.3967	3.39	Handbook 2017
Methyl hexadecanoate	112-39-0	40	312.28	1.44073	2.69047	3.23913	3.23	Handbook 2017
Ethyl hexadecanoate	628-97-7	30	328.85	1.44205	2.60829	3.22091	3.21	Handbook 2017
Methyl heptadecanoate	1731-92-6	40	328.85	1.44205	2.69433	3.18099	3.17	Handbook 2017
Methyl octadecanoate	112-61-8	40	345.42	1.44325	2.68515	3.12863	3.12	Handbook 2017
Ethyl octadecanoate	111-61-5	40	361.99	1.44434	2.63493	3.08126	3.07	Handbook 2017
Methyl nonadecanoate	1731-94-8	40	361.99	1.44434	2.69053	3.08122	3.07	Handbook 2017
Butyl stearate	123-95-5	25	395.13	1.44625	3.17296	3.04819	3.04	Handbook 2017
Hexadecyl stearate	1190-63-2	60	593.97	1.45325	2.68865	2.6653	2.66	Handbook 2017
Methyl cyclohexanecarboxylate	4630-82-4	20	144.92	1.44752	2.80459	5.05477	5.03	Handbook 2017
Ethyl cyclohexanecarboxylate	3289-28-9	20	161.49	1.44954	2.878	4.73084	4.71	Handbook 2017
Methyl cis,cis,cis-9,12,15-octadecatrienoate	301-00-8	20	325.38	1.47688	2.7977	3.43961	3.43	Handbook 2017
Methyl cis,cis-9,12-octadecadienoate (Methyl linoleate)	112-63-0	20	332.06	1.46513	3.22143	3.35642	3.35	Handbook 2017
Methyl cis-9-octadecenoate (Methyl oleate)	112-62-9	20	338.74	1.45393	2.80735	3.27946	3.27	Handbook 2017
Ethyl cis-9-octadecenoate (Ethyl oleate)	111-62-6	28	355.31	1.45455	2.91683	3.19071	3.18	Handbook 2017
Butyl cis-9-octadecenoate (Butyl oleate)	142-77-8	25	388.45	1.45563	5.33423	3.10487	3.1	Handbook 2017
Benzyl acetate	140-11-4	30	142.15	1.51207	2.85553	5.47815	5.45	Handbook 2017
Benzyl propanoate	122-63-4	30	158.72	1.50732	3.00336	5.07355	5.05	Handbook 2017
Benzyl butanoate	103-37-7	28	175.29	1.50349	2.72974	4.77709	4.76	Handbook 2017
Ethyl phenylacetate	101-97-3	20	158.72	1.50732	3.0968	5.17832	5.16	Handbook 2017
2-Phenylethyl acetate	103-45-7	24	158.72	1.50732	2.7755	5.14043	5.12	Handbook 2017
Phenyl carboxylates
Phenyl acetate	122-79-2	25	125.58	1.5181	2.49228	5.16424	5.2	Handbook 2017
Phenyl propanoate	637-27-4	20	142.15	1.51207	2.29322	4.90888	4.84	Handbook 2017
Phenyl butanoate	4346-18-3	20	158.72	1.50732	2.31736	4.56094	4.51	Handbook 2017
Phenyl pentanoate	20115-23-5	20	175.29	1.50349	2.39446	4.28205	4.26	Handbook 2017
Phenyl dodecanoate	4228-00-6	20	291.28	1.48895	2.24276	3.35387	3.34	Handbook 2017
Benzoates
Methyl benzoate	93-58-3	30	125.58	1.5181	3.43265	6.37828	6.5	Handbook 2017
Ethyl benzoate	93-89-0	20	142.15	1.51207	3.45245	5.94553	6.05	Handbook 2017
Methyl 4-methylbenzoate	99-75-2	33	141.93	1.5153	1.96286	6.09281	5.9	Handbook 2017
Propyl benzoate	2315-68-6	30	158.72	1.50732	3.63414	5.35634	5.46	Handbook 2017
Butyl benzoate	136-60-7	30	175.29	1.50349	3.77527	5.00372	5.1	Handbook 2017
TRAINING	120-50-3	18	176.19	1.50068	3.53462	5.11439	5.19	Handbook 2017
Pentyl benzoate	2049-96-9	20	191.86	1.50032	3.52098	4.83908	4.9	Handbook 2017
Hexyl benzoate	6789-88-4	20	208.43	1.49766	3.51579	4.59772	4.65	Handbook 2017
Benzyl benzoate	120-51-4	30	187.43	1.58369	3.12907	5.42373	5.46	Handbook 2017
Cinnamates
Butyl cinnamate	538-65-8	20	201.75	1.51825	3.62546	5.23337	5.2	Volume 6 - 64B2
Hexyl cinnamate	3488-00-4	20	234.89	1.51094	3.74455	4.69907	4.7	Volume 6 - 64B2
Hepthyl cinnamate	10032-08-3	20	251.46	1.50801	3.81425	4.49614	4.51	Volume 6 - 64B2
Octyl cinnamate	69038-78-4	20	268.03	1.50546	3.77133	4.3357	4.34	Volume 6 - 64B2
Decyl cinnamate	94865-57-3	20	301.17	1.5012	3.67949	4.06884	4.07	Volume 6 - 64B2
Dodecyl cinnamate	96059-66-4	20	334.31	1.4978	3.64533	3.85408	3.85	Volume 6 - 64B2
Acrylates
Methyl acrylate	96-33-3	30	91.12	1.40452	3.31467	6.85216	6.92	Handbook 2017
Ethyl acrylate	140-88-5	30	107.69	1.41399	3.16358	6.25142	6.17	Handbook 2017
Butyl acrylate	141-32-2	28	140.83	1.42635	3.2845	5.21419	5.21	Handbook 2017
Chloroformates
Ethyl chloroformate	541-41-3	36	92.03	1.40895	5.02721	11.793	11.06	Handbook 2017
Propyl chlorocarbonate	109-61-5	20	108.6	1.41769	6.51178	9.46058	10.15	Handbook 2017
Isobutyl chlorocarbonate	543-27-1	20	126.07	1.421	5.90994	8.82017	8.98	Handbook 2017
Chlorocarboxylates
Methyl chloroacetate	96-34-4	20	92.03	1.40895	6.04906	14.7384	13.93	Handbook 2017
Methyl 2-chloropropanoate	17639-93-9	30	109.5	1.41413	7.00169	11.2026	11.65	Handbook 2017
Ethyl 2-chloropropanoate	535-13-7	30	126.07	1.421	8.36729	9.49961	10.4	Handbook 2017
Trichloroacetates
Ethyl trichloroacetate	515-84-4	20	133.11	1.46929	5.24119	9.13802	8.89	Handbook 2017
Propyl trichloroacetate	13313-91-2	25	149.68	1.46907	5.90015	7.74381	7.97	Handbook 2017
Butyl trichloroacetate	3657-07-6	20	166.25	1.46889	5.63859	7.36211	7.43	Handbook 2017
Bromocarboxylates
Ethyl bromoacetate	105-36-2	30	111.38	1.44979	5.58345	10.511	10.28	Handbook 2017
Ethyl 2-bromopropanoate	535-11-5	20	128.85	1.4487	5.99287	9.17477	9.33	Handbook 2017
Ethyl 2-bromobutanoate	533-68-6	30	145.42	1.4508	6.23696	8.03693	8.23	Handbook 2017
Phthalates
Dimethyl phthalate	131-11-3	20	163.07	1.51732	6.10899	9.42576	9.23	Handbook 2017
Diethyl phthalate	84-66-2	20	196.21	1.50873	6.60279	7.64153	7.87	Handbook 2017
Dibutyl phthalate	84-74-2	20	262.49	1.49814	7.11858	6.03492	6.24	Handbook 2017
Nitrites
Propyl nitrite	543-67-9	-23	91.28	1.37569	5.57179	12.7815	12.43	Handbook 2017
Isopropyl nitrite	541-42-4	-13	92.18	1.37199	6.71461	11.3703	11.83	Handbook 2017
tert-Butyl nitrite	540-80-7	25	108.9	1.38992	7.13239	9.11138	9.3	Handbook 2017
Pentyl nitrite	463-04-7	25	124.42	1.39951	4.63674	8.74484	8.42	Handbook 2017
Benzyl nitrite	935-05-7	25	119.99	1.51817	3.9852	11.0005	10.26	Handbook 2017
Pyridines
Pyridine (Azine)	110-86-1	20	82.28	1.51324	5.1294	12.6013	12.6	Handbook 2017
2-Methylpyridine (2-Picoline)	109-06-8	20	98.63	1.51003	4.55287	11.0007	10.72	Handbook 2017
3-Methylpyridine (3-Picoline)	108-99-6	30	98.63	1.51003	5.21261	10.451	10.42	Handbook 2017
4-Methylpyridine (4-Picoline)	108-89-4	20	98.63	1.51003	5.62172	10.5839	10.72	Handbook 2017
2,4-Dimethylpyridine (2,4-Lutidine)	108-47-4	20	114.98	1.50774	4.96694	9.50267	9.4	Handbook 2017
2,6-Dimethylpyridine (2,6-Lutidine)	108-48-5	20	114.98	1.50774	3.54045	9.82266	9.4	Handbook 2017
Quinolines
Quinoline (1-Azanaphthalene)	91-22-5	20	117.45	1.60814	4.03294	9.34217	9.28	Handbook 2017
2-Methylquinoline (Quinaldine)	91-63-4	20	133.8	1.59364	3.453	8.62112	8.22	Handbook 2017
4-Methylquinoline (Lepidine)	491-35-0	20	133.8	1.59364	4.80867	7.74953	8.22	Handbook 2017
Phosphonates
Dimethyl ethylphosphonate	6163-75-3	40	130.76	1.40058	12.6703	11.969	11.24	Volume 6 - 54K2
Diethyl methanephosphonate	683-08-9	40	147.33	1.40792	11.7249	11.2891	10.23	Volume 6 - 54K2
Diethyl ethanephosphonate	78-38-6	32	163.9	1.41381	9.71948	11.0151	9.62	Volume 6 - 54K2
Diethyl 1-propanephosphonate	18812-51-6	30	180.47	1.41864	9.28585	10.3032	8.97	Volume 6 - 54K2
Diethyl 2-propanephosphonate	1538-69-8	30	181.37	1.41648	8.14353	10.3715	8.91	Volume 6 - 54K2
Diethyl octanephosphonate	1068-07-1	32	263.32	1.43375	7.90294	7.64957	6.73	Volume 6 - 54K1
Diethyl dodecanephosphonate	4844-38-6	32	329.6	1.44043	7.37079	6.47143	5.75	Volume 6 - 54K1
Diethyl tetradecanephosphonate	5191-09-3	32	362.74	1.44286	6.8091	6.04945	5.4	Volume 6 - 54K1
Diethyl hexadecanephosphonate	16165-71-2	32	395.88	1.44489	6.47436	5.69576	5.11	Volume 6 - 54K1
Diethyl octadecanephosphonate	16165-72-3	32	429.02	1.4466	6.32184	5.39651	4.86	Volume 6 - 54K1
Phosphates
Trimethyl phosphate	512-56-1	20	120.44	1.39215	14.6084	17.5252	18.11	Handbook 2017
Triethyl phosphate	78-40-0	25	170.15	1.41369	12.5555	14.2995	13.38	Handbook 2017
Tripropyl phosphate	513-08-6	20	219.86	1.42562	12.6586	11.6182	10.99	Handbook 2017
Tributyl phosphate	126-73-8	20	269.57	1.43321	11.1474	9.91274	9.32	Handbook 2017
Carbamates
Methyl carbamate	598-55-0	55	68.53	1.40728	8.10263	17.0969	17.58	Handbook 2017
Ethyl carbamate	51-79-6	55	85.1	1.41876	7.39778	15.0635	14.63	Handbook 2017
Propyl carbamate	627-12-3	65	101.67	1.42655	7.53804	12.4625	12.26	Handbook 2017
Alkyl-derivatives of urea
Tetramethylurea	632-22-4	20	127.05	1.44372	16.1037	21.2922	22.02	Handbook 2017
Tetraethylurea	1187-03-7	24	193.33	1.45175	14.6262	15.4951	14.9	Handbook 2017
Tetrabutyl urea	4559-86-8	25	325.89	1.45804	15.1958	9.65318	9.47	Volume 6 - 58H1
Isocyanates
Methyl isocyanate	624-83-9	16	61.78	1.37641	8.01408	22.6839	21.82	Handbook 2017
Ethyl isocyanate	109-90-0	20	78.35	1.39515	9.02278	17.1715	17.68	Handbook 2017
Isobutyl isocyanate	1873-29-6	20	112.39	1.41275	7.09546	13.5499	13.02	Handbook 2017
Nitroalkanes
Nitromethane	75-52-5	20	56.28	1.35643	13.3402	36.1696	35.48	Handbook 2017
Nitroethane	79-24-3	15	72.85	1.38089	12.6882	30.2744	29.09	Handbook 2017
1-Nitropropane	108-03-2	15	89.42	1.39651	12.8232	25.2817	24.44	Handbook 2017
2-Nitropropane (Isonitropropane)	79-46-9	15	90.32	1.39246	14.1571	24.4182	24.07	Handbook 2017
1-Nitrooctane	629-37-8	20	172.27	1.43009	10.3933	14.2147	13.69	Handbook 2017
Nitroaromatic compounds
Nitrobenzene	98-95-3	20	101.56	1.54992	17.3132	29.9345	31.3	Handbook 2017
2-Nitrotoluene (1-Methyl-2-nitrobenzene)	88-72-2	20	117.91	1.54203	14.7849	27.6581	26.86	Handbook 2017
3-Nitrotoluene (1-Methyl-3-nitrobenzene)	99-08-1	30	117.91	1.54203	14.4835	26.9085	26.02	Handbook 2017
4-Nitrotoluene (1-Methyl-4-nitrobenzene)	99-99-0	58	117.91	1.54203	13.972	24.8488	23.94	Handbook 2017
Nitrates
Methyl nitrate	598-58-3	20	62.53	1.36174	9.2796	18.8362	22.97	Handbook 2017
Ethyl nitrate	625-58-1	20	79.1	1.38321	9.27415	16.3869	18.95	Handbook 2017
Butyl nitrate	928-45-0	20	112.24	1.40751	8.15359	12.9559	14.18	Handbook 2017
Anhydrides
Acetic anhydride (Acetyl acetate)	108-24-7	20	95.19	1.3987	12.5206	22.2399	22.04	Handbook 2017
Propanoic anhydride	123-62-6	20	128.33	1.41609	13.2359	16.8804	17.07	Handbook 2017
Butanoic anhydride	106-31-0	20	161.47	1.42644	11.0965	14.5455	14.03	Handbook 2017
Aldehydes
Ethanal (Acetaldehyde)	75-07-0	18	57.7	1.34421	7.62047	20.0255	19.61	Handbook 2017
Propanal	123-38-6	17	74.27	1.37077	8.21412	16.1789	16.12	Handbook 2017
Butanal	123-72-8	25	90.84	1.38789	7.12499	13.9969	13.39	Handbook 2017
Pentanal	110-62-3	20	107.41	1.39985	5.82246	12.6787	11.89	Handbook 2017
Heptanal	111-71-7	22	140.55	1.41545	6.66942	9.96735	9.55	Handbook 2017
Ketones
2-Propanone (Acetone)	67-64-1	20	74.05	1.36312	9.57777	20.623	20.72	Handbook 2017
2-Butanone	78-93-3	20	90.62	1.38161	9.99619	17.4237	17.59	Handbook 2017
2-Pentanone	107-87-9	20	107.19	1.39452	9.51981	15.2932	15.33	Handbook 2017
3-Pentanone	96-22-0	20	107.19	1.39452	10.5551	15.1373	15.33	Handbook 2017
3-Methyl-2-butanone	563-80-4	20	108.09	1.39116	6.19619	15.5819	15.14	Handbook 2017
2-Hexanone	591-78-6	20	123.76	1.40404	10.1536	13.5323	13.62	Handbook 2017
4-Methyl-2-pentanone	108-10-1	20	124.66	1.40104	9.15583	13.4835	13.48	Handbook 2017
3,3-Dimethyl-2-butanone	75-97-8	20	124.81	1.40439	8.82614	13.5647	13.53	Handbook 2017
2-Heptanone	110-43-0	20	140.33	1.41136	9.14553	12.2938	12.29	Handbook 2017
3-Heptanone	106-35-4	20	140.33	1.41136	9.78966	12.2498	12.29	Handbook 2017
4-Heptanone	123-19-3	20	140.33	1.41136	9.70383	12.2557	12.29	Handbook 2017
5-Methyl-2-hexanone	110-12-3	20	141.23	1.40865	10.6136	12.0795	12.18	Handbook 2017
Cyclic ketones
Cyclobutanone	1191-95-3	25	75.49	1.41215	6.08481	18.6993	18.95	Handbook 2017
Cyclopentanone	120-92-3	25	90.58	1.42981	6.7255	15.6476	16.4	Handbook 2017
Cyclohexanone	108-94-1	20	104.63	1.44763	8.95661	13.6186	14.97	Handbook 2017
2-Methylcyclohexanone	583-60-8	20	122.1	1.44679	8.97803	11.9391	13	Handbook 2017
3-Methylcyclohexanone	625-96-7	20	122.1	1.44679	7.84134	12.1204	13	Handbook 2017
4-Methylcyclohexanone	589-92-4	20	122.1	1.44679	7.80576	12.1261	13	Handbook 2017
Cycloheptanone	502-42-1	25	118.06	1.46421	8.01951	12.572	13.53	Handbook 2017
Cyclododecanone	830-13-7	30	200.91	1.46547	11.7708	7.8274	8.46	Handbook 2017
Nitriles
Acetonitrile	75-05-8	20	53.56	1.34245	12.731	32.396	34.96	Handbook 2017
Propanenitrile	107-12-0	20	70.13	1.37098	12.8739	26.1707	28.05	Handbook 2017
Butanenitrile	109-74-0	20	86.7	1.38889	12.863	22.0127	23.48	Handbook 2017
2-Methylpropanenitrile	78-82-0	20	87.6	1.38481	12.8492	21.6801	23.12	Handbook 2017
Pentanenitrile	110-59-8	20	103.27	1.40117	12.0015	19.0955	20.24	Handbook 2017
2,2-Dimethylpropanenitrile	630-18-2	20	104.32	1.40162	12.7959	18.872	20.06	Handbook 2017
Hexanenitrile	628-73-9	25	119.84	1.41013	11.9131	16.5839	17.55	Handbook 2017
4-Methylpentanenitrile	542-54-1	22	120.74	1.40697	12.1176	16.5412	17.52	Handbook 2017
Octanenitrile	124-12-9	20	152.98	1.42231	11.5942	13.7145	14.48	Handbook 2017
Nonanenitrile	2243-27-8	20	169.55	1.42664	10.9168	12.5913	13.27	Handbook 2017
Cyclopentanecarbonitrile	4254-02-8	20	104.13	1.43993	13.0185	19.9252	21.22	Handbook 2017
Benzeneacetonitrile	140-29-4	26	115.41	1.53517	9.87736	20.5787	21.61	Handbook 2017
N,N-formamides
N,N-Dimethylformamide (DMF)	68-12-2	20	84.2	1.40996	18.9618	39.05	38.4	Handbook 2017
N,N-Diethylformamide	617-84-5	20	117.34	1.42591	19.8006	28.233	28.51	Handbook 2017
N,N-Dibutylformamide	761-65-9	20	183.62	1.4407	18.3521	19.2433	19.04	Handbook 2017
N,N-amides
N,N-Dimethylacetamide	127-19-5	21	100.55	1.41351	22.9692	38.5249	37.29	Handbook 2017
N,N-Diethylacetamide	685-91-6	20	133.69	1.42664	24.5155	29.2927	28.95	Handbook 2017
N,N-Dibutylacetamide	1563-90-2	20	199.97	1.43998	20.8251	21.0729	20.12	Handbook 2017
N,N-Di(2-Propyl)acetamide	759-22-8	25	168.63	1.42976	22.2972	23.8534	22.93	Volume 6 - 73R4
N,N-Dioctylacetamide	4088-41-9	20	332.53	1.45079	19.4835	13.3287	12.82	Volume 6 - 70S1
Sulfoxydes
Dimethyl sulfoxide (DMSO)	67-68-5	20	79.63	1.43071	21.6118	55.4732	53.41	Handbook 2017
Dipropyl sulfoxide	4253-91-2	30	145.91	1.4472	25.3452	27.0957	29.4	Handbook 2017
Dibutyl sulfoxide	2168-93-6	40	179.05	1.45089	25.7731	21.8977	23.57	Handbook 2017
Dipentyl sulfoxide	1986-90-9	75	212.19	1.45344	25.282	17.1257	18.26	Handbook 2017
Sulfones
Ethyl methyl sulfone	594-43-4	30	101.77	1.40383	36.2937	46.1848	47.08	Volume 17 - 1991KOL1
Methyl propyl sulfone	1977-37-3	30	118.34	1.41254	29.3405	43.8957	41.14	Volume 17 - 1991KOL1
Butyl methyl sulfone	7560-59-0	30	134.91	1.41915	28.7049	39.0022	36.56	Volume 17 - 1991KOL1
Dipropyl sulfone	598-03-8	30	151.48	1.42433	29.3069	34.8879	32.92	Handbook 2017
Dibutyl sulfone	598-04-9	50	184.62	1.43194	29.3924	27.2992	25.88	Handbook 2017
Dipentyl sulfone	4253-99-0	75	217.76	1.43726	28.4064	21.8961	20.78	Volume 6 - 73B1
Dioctyl sulfone	7726-20-7	75	317.18	1.4466	28.5816	15.5938	14.86	Volume 6 - 73B1
Dinonyl sulfone	15647-03-7	85	350.32	1.44854	26.6631	13.9313	13.28	Volume 6 - 73B1
Phenyl sulfones
Methyl phenyl sulfone	3112-85-4	100	130.48	1.53023	31.0939	38.7815	36.79	Handbook 2017
Ethyl phenyl sulfone	599-70-2	75	147.05	1.52299	34.0347	34.2759	34.7	Handbook 2017
Nonyl phenyl sulfone	51250-40-9	50	263.04	1.49813	25.3104	22.1945	20.7	Volume 6 - 73B1
Sulfolanes
Tetrahydrothiophene-S,S-dioxide	126-33-0	30	101.73	1.44736	25.5254	35.744	38.47	Volume 6 - 69T1
3-Methyl sulfolane	872-93-5	25	119.2	1.44654	19.7063	36.1086	33.5	Handbook 2017
2,4-Dimethyl tetrahydrothiophene-S,S-dioxide	1003-78-7	20	136.67	1.44592	22.4642	30.4092	29.82	Volume 6 - 74C1
Pyridine-oxides
Pyridine-1-oxide	694-59-7	70	86.67	1.53517	17.8468	36.0565	36.06	Handbook 2017
2-Methylpyridine-1-oxide	931-19-1	50	103.02	1.52855	20.4389	30.1166	32.06	Handbook 2017
3-Methylpyridine-1-oxide	1003-73-2	45	103.02	1.52855	15.4512	34.4166	32.54	Handbook 2017
Lactones
gamma-Butyrolactone	96-48-0	20	80.26	1.42069	18.1538	44.5917	43.44	Handbook 2017
gamma-Valerolactone	108-29-2	20	97.73	1.42443	20.7723	35.1114	36.06	Volume 17 - 1999FOR1
delta-Valerolactone	542-28-9	20	94.31	1.44172	18.9283	38.2969	38.25	Volume 17 - 1999FOR1
epsilon-Caprolactone	502-44-3	20	107.74	1.46056	23.2564	32.6369	34.54	Volume 17 - 1999FOR1
Phosphine oxides
Triethylphosphine oxide	597-50-2	50	151.4	1.41409	34.5934	35.6174	38.38	Handbook 2017
Dimethyl hexylphosphine oxide	28520-49-2	50	184.54	1.42349	29.8467	31.6196	32.11	Volume 6 - 76V1
Tributylphosphine oxide	814-29-9	50	250.82	1.43493	40.8576	21.7537	24.32	Volume 6 - 76V1
Trinonylphosphine oxide	17262-53-2	50	499.37	1.45093	44.6631	12.1042	13.14	Volume 6 - 76V1
Phosphine sulfides
Trimethylphosphine sulfide	2404-55-9	20	112.72	1.49373	42.7003	71.4098	71.78	Volume 6 - 76V1
Triethylphosphine sulfide	597-51-3	98	162.43	1.48558	42.3215	39.3729	39.44	Handbook 2017
Tributylphosphine sulfide	3084-50-2	20	261.85	1.4786	42.6195	30.8316	30.93	Volume 6 - 76V1
Triheptylphosphine sulfide	21722-49-6	20	410.98	1.47448	43.5933	19.9717	20.06	Volume 6 - 76V1
Oxazolidine-2-one derivatives
5-Methyl oxazolidine-2-one	1072-70-4	25	88.9	1.45347	42.6727	50.6343	61.79	Volume 6 - 72H1
4,4-Dimethyl-oxazolidine-2-one	26654-39-7	60	105.62	1.45966	25.7876	53.3995	47.24	Volume 6 - 72H1
4-Ethyl-oxazolidine-2-one	16112-60-0	25	105.47	1.45563	25.2539	61.0523	52.42	Volume 6 - 72H1
3-Methyl oxazolidine-2-one	19836-78-3	25	90.19	1.45284	39.9327	81.7192	81.24	Volume 6 - 72H1
3-Ethyl-oxazolidine-2-one	5261-18-7	25	106.76	1.45507	40.5176	68.5072	69.02	Volume 6 - 72H1
3-(1-Butyl)-oxazolidine-2-one	23288-01-9	25	139.9	1.45795	41.2795	52.3929	53.16	Volume 6 - 72H1
3-(2-Methyl-2-propyl)-oxazolidine-2-one	40482-46-0	25	140.95	1.45786	45.8146	50.9207	52.76	Volume 6 - 72H1
Carbonates
Dimethyl carbonate	616-38-6	25	86.55	1.36987	0.892071	3.10098	3.09	Handbook 2017
Ethyl methyl carbonate	623-53-0	20	103.12	1.38507	0.91509	2.9541	2.96	Handbook 2017
Diethyl carbonate	105-58-8	24	119.69	1.39617	0.877369	2.84637	2.83	Handbook 2017
Cyclic carbonates
Ethylene carbonate (1,3-Dioxolan-2-one)	96-49-1	40	69.94	1.40897	40.1995	77.1173	81.41	Handbook 2017
Propylene carbonate (4-Methyl-1,3-dioxolan-2-one)	108-32-7	20	87.41	1.41545	34.182	74.0367	70.38	Handbook 2017
Butylene carbonate (4-Ethyl-1,3-dioxolan-2-one)	4437-85-8	20	103.98	1.42358	34.8523	62.0007	60.02	Volume 17 - 2006CHE1
Sydnones
3-Methylsydnone	6939-12-4	40	79.52	1.45365	69.0878	93.7026	106.21	Volume 6 - 77L1
3-Isopropylsydnone	6939-17-9	60	113.56	1.45379	47.659	79.0165	70.3	Volume 6 - 77L1
3-Butylsydnone	64180-21-8	25	129.23	1.45887	38.3777	80.9428	69.55	Volume 6 - 77L1
3-Propyl-4-methylsydnone	18358-66-2	25	129.01	1.4622	48.1677	78.479	69.99	Volume 6 - 77L1
Carboxylic acids
Ethanoic acid (Acetic acid)	64-19-7	20	56.25	1.38691	1.7377	3.48634	3.68	Handbook 2017
Propanoic acid	79-09-4	25	72.82	1.40479	0.852252	3.63898	3.3	Handbook 2017
Butanoic acid	107-92-6	14	89.39	1.41617	0.684246	3.43119	3.13	Handbook 2017
2-Methylpropanoic acid	79-31-2	20	90.29	1.41187	0.443277	3.39139	3.07	Handbook 2017
Pentanoic acid	109-52-4	21	105.96	1.42403	0.550816	3.19075	2.95	Handbook 2017
Hexanoic acid	142-62-1	25	122.53	1.4298	0.567783	3.02121	2.83	Handbook 2017
2-Ethylbutanoic acid	88-09-5	23	123.43	1.42653	0.694	3.00081	2.81	Handbook 2017
tert-Butylacetic acid	1070-83-3	23	123.58	1.42994	0.8038	3.00892	2.82	Handbook 2017
Heptanoic acid	111-14-8	15	139.1	1.43421	1.05211	2.92585	2.77	Handbook 2017
Octanoic acid	124-07-2	15	155.67	1.4377	0.950237	2.84341	2.7	Handbook 2017
2-Ethylhexanoic acid	149-57-5	23	156.57	1.43505	0.745798	2.81015	2.67	Handbook 2017
Nonanoic acid	112-05-0	22	172.24	1.44051	0.577376	2.76239	2.63	Handbook 2017
2-Methyloctanoic acid	3004-93-1	20	173.14	1.4381	0.46441	2.75598	2.62	Handbook 2017
2-Ethylheptanoic acid	3274-29-1	20	173.14	1.4381	-0.13513	2.76452	2.62	Handbook 2017
Hexadecanoic acid	57-10-3	65	288.23	1.45122	0.855399	2.45377	2.39	Handbook 2017
Octadecanoic acid	57-11-4	20	321.37	1.45287	0.531267	2.47267	2.41	Handbook 2017
2,2-Dimethyloctanoic acid	29662-90-6	23	189.86	1.44286	1.09176	2.69397	2.58	Handbook 2017
Cyclohexanecarboxylic acid	98-89-5	31	120.87	1.47418	0.484531	3.21315	3	Handbook 2017
cis,cis-9,12-Octadecadienoic acid (Linoleic acid)	60-33-3	20	308.01	1.47706	1.34591	2.57107	2.5	Handbook 2017
cis,cis,cis-9,12,15-Octadecatrienoic acid (α-Linolenic acid)	463-40-1	20	301.33	1.49014	1.38199	2.62614	2.55	Handbook 2017
cis-9-Octadecenoic acid (Oleic acid)	112-80-1	20	314.69	1.46465	0.500875	2.52147	2.45	Handbook 2017
Benzeneacetic acid (Phenylacetic acid)	103-82-2	80	118.1	1.55454	0.99719	3.40527	3.22	Handbook 2017
Phenols
Phenol	108-95-2	30	86.64	1.56668	4.75102	10.113	9.57	Handbook 2017
2-Methylphenol (o-Cresol)	95-48-7	25	102.99	1.55488	2.64495	9.38948	8.31	Handbook 2017
3-Methylphenol (m-Cresol)	108-39-4	25	102.99	1.55488	5.68183	8.64441	8.31	Handbook 2017
4-Methylphenol (p-Cresol)	106-44-5	25	102.99	1.55488	6.0027	8.56428	8.31	Handbook 2017
2,3-Dimethylphenol (2,3-Xylenol)	526-75-0	70	119.34	1.54637	2.10614	7.34564	6.63	Handbook 2017
2,4-Dimethylphenol (2,4-Xylenol)	105-67-9	30	119.34	1.54637	2.03275	8.13946	7.25	Handbook 2017
2,5-Dimethylphenol (2,5-Xylenol)	95-87-4	65	119.34	1.54637	2.49535	7.39756	6.7	Handbook 2017
2,6-Dimethylphenol (2,6-Xylenol)	576-26-1	40	119.34	1.54637	1.98624	7.92576	7.08	Handbook 2017
3,4-Dimethylphenol (3,4-Xylenol)	95-65-8	60	119.34	1.54637	5.08312	7.23294	6.77	Handbook 2017
3,5-Dimethylphenol (3,5-Xylenol)	108-68-9	50	119.34	1.54637	4.95774	7.40378	6.92	Handbook 2017
2-Cyclohexylphenol	119-42-6	55	167.61	1.55492	1.87398	5.98689	5.51	Handbook 2017
2-Isopropyl-5-methylphenol (Thymol)	89-83-8	60	153.38	1.52534	2.2063	6.03445	5.54	Handbook 2017
Salicylates
Methyl salicylate	119-36-8	41	124.13	1.55077	4.79743	8.17475	8.26	Handbook 2017
Ethyl salicylate	118-61-6	35	140.7	1.54066	5.18126	7.32411	7.51	Handbook 2017
Pentyl salicylate	2050-08-0	28	190.41	1.52111	4.7205	6.02248	5.98	Handbook 2017
Isopentyl salicylate	87-20-7	20	191.31	1.5184	5.70379	5.94738	6.05	Handbook 2017
Benzyl salicylate	118-58-1	28	185.98	1.60707	1.7684	7.49921	6.84	Handbook 2017
Fluoroalkanes
1-Fluoropentane	592-50-7	20	113.49	1.36245	1.88338	4.54436	4.3	Handbook 2017
2-Fluoro-2-methylbutane	661-53-0	20	114.54	1.36319	3.45743	6.09415	5.89	Volume 6 - 42A3
1-Fluorooctane	463-11-6	20	163.2	1.39357	2.46108	3.45629	3.64	Handbook 2017
2-Fluorooctane	407-95-4	20	164.1	1.39136	2.80717	4.15835	4.18	Volume 6 - 64G2
3-Fluorooctane	20469-83-4	20	164.1	1.39136	2.93113	4.14241	4.18	Volume 6 - 64G2
4-Fluorooctane	13296-59-8	20	164.1	1.39136	2.79588	4.1598	4.18	Volume 6 - 64G2
Chloroalkanes
Chloromethane	74-87-3	22	54.32	1.3474	3.22866	8.44674	8.76	Handbook 2017
Chloroethane	75-00-3	20	70.89	1.37454	3.75191	9.47454	9.53	Handbook 2017
1-Chloropropane	540-54-5	20	87.46	1.39165	4.02217	8.09847	8.17	Handbook 2017
1-Chlorobutane	109-69-3	20	104.03	1.40342	3.83158	7.17083	7.22	Handbook 2017
2-Chlorobutane	78-86-4	20	104.93	1.39986	4.73928	8.41436	8.67	Handbook 2017
1-Chloro-2-methylpropane	513-36-0	20	104.93	1.39986	3.72207	7.09245	7.13	Handbook 2017
2-Chloro-2-methylpropane	507-20-0	20	105.08	1.40384	5.43652	9.87628	10.26	Handbook 2017
1-Chloropentane	543-59-9	20	120.6	1.41203	3.89718	6.46778	6.51	Handbook 2017
1-Chloro-3-methylbutane	107-84-6	19	121.5	1.40887	3.51225	6.43359	6.46	Handbook 2017
2-Chloro-2-methylbutane	594-36-5	-50	121.65	1.41232	6.22969	10.4194	11.6	Handbook 2017
1-Chlorohexane	544-10-5	20	137.17	1.41858	3.90586	5.9306	5.97	Handbook 2017
1-Chloroheptane	629-06-1	20	153.74	1.42375	3.77306	5.50879	5.54	Handbook 2017
2-Chloroheptane	1001-89-4	22	154.64	1.42118	4.821	6.33838	6.51	Handbook 2017
3-Chloroheptane	999-52-0	22	154.64	1.42118	4.99576	6.33098	6.51	Handbook 2017
4-Chloroheptane	998-95-8	22	154.64	1.42118	4.84044	6.33755	6.51	Handbook 2017
1-Chlorooctane	111-85-3	25	170.31	1.42793	3.69916	5.10796	5.13	Handbook 2017
2-Chlorooctane	628-61-5	20	171.21	1.42558	4.07803	5.96928	6.1	Handbook 2017
1-Chlorononane	2473-01-0	20	186.88	1.43137	3.66371	4.88343	4.91	Handbook 2017
1-Chlorodecane	1002-69-3	20	203.45	1.43426	3.67618	4.64649	4.67	Handbook 2017
1-Chlorododecane	112-52-7	25	236.59	1.43884	3.66477	4.23263	4.25	Handbook 2017
Bromoalkanes
Bromomethane	74-83-9	3	57.1	1.41108	2.76646	7.7873	8.61	Handbook 2017
Bromoethane	74-96-4	25	73.67	1.42352	3.45655	9.16243	9.3	Handbook 2017
1-Bromopropane	106-94-5	20	90.24	1.43145	3.60634	7.92714	8.06	Handbook 2017
2-Bromopropane	75-26-3	20	91.14	1.427	4.4283	9.87439	10.1	Handbook 2017
1-Bromobutane	109-65-9	10	106.81	1.43695	3.60436	7.1824	7.3	Handbook 2017
2-Bromobutane	5787-31-5	25	107.71	1.43312	4.72894	8.48017	8.72	Handbook 2017
1-Bromo-2-methylpropane	78-77-3	0	107.71	1.43312	3.76225	7.28974	7.42	Handbook 2017
2-Bromo-2-methylpropane	507-19-7	20	107.86	1.43704	6.12856	10.1619	10.73	Handbook 2017
1-Bromopentane	110-53-2	26	123.38	1.44098	3.59606	6.2106	6.3	Handbook 2017
3-Bromopentane	1809-10-5	25	124.28	1.43762	5.21024	7.5629	7.8	Handbook 2017
1-Bromo-3-methylbutane	107-82-4	18	124.28	1.43762	3.56312	6.27348	6.37	Handbook 2017
2-Bromo-2-methylbutane	507-36-8	25	124.43	1.44103	5.81915	9.08261	9.41	Handbook 2017
1-Bromohexane	111-25-1	25	139.95	1.44407	3.61551	5.71039	5.79	Handbook 2017
1-Bromoheptane	629-04-9	30	156.52	1.44651	3.53333	5.24793	5.32	Handbook 2017
2-Bromoheptane	1974-04-5	22	157.42	1.44381	4.6471	6.44313	6.6	Handbook 2017
4-Bromoheptane	998-93-6	22	157.42	1.44381	4.983	6.43014	6.6	Handbook 2017
1-Bromooctane	111-83-1	20	173.09	1.44848	3.5911	5.03449	5.1	Handbook 2017
2-Bromooctane	557-35-7	20	173.99	1.44603	3.99587	6.05349	6.18	Handbook 2017
1-Bromononane	693-58-3	25	189.66	1.45011	3.55454	4.71238	4.77	Handbook 2017
1-Bromodecane	112-29-8	25	206.23	1.45148	3.45608	4.48947	4.54	Handbook 2017
1-Bromoundecane	693-67-4	-1	222.8	1.45265	3.62082	4.53313	4.59	Handbook 2017
1-Bromododecane	143-15-7	25	239.37	1.45366	3.4147	4.13838	4.18	Handbook 2017
1-Bromotridecane	765-09-3	8	255.94	1.45453	3.62438	4.12426	4.17	Handbook 2017
1-Bromotetradecane	112-71-0	20	272.51	1.45531	3.39891	3.90918	3.95	Handbook 2017
1-Bromopentadecane	629-72-1	20	289.08	1.45599	3.67415	3.79883	3.84	Handbook 2017
1-Bromohexadecane	112-82-3	25	305.65	1.4566	3.53647	3.67263	3.71	Handbook 2017
1-Bromooctadecane	112-89-0	30	338.79	1.45764	3.62429	3.48602	3.52	Handbook 2017
Iodoalkanes
Iodomethane	74-88-4	20	65.22	1.5095	1.87205	7.07029	7.49	Handbook 2017
Iodoethane	75-03-6	20	81.79	1.50084	2.77324	8.22953	8.32	Handbook 2017
1-Iodopropane	107-08-4	20	98.36	1.49512	2.95542	7.02405	7.15	Handbook 2017
2-Iodopropane	75-30-9	25	99.26	1.49025	3.69776	8.81199	8.62	Handbook 2017
1-Iodobutane	542-69-8	20	114.93	1.49107	2.9553	6.23271	6.34	Handbook 2017
2-Iodobutane	513-48-4	20	115.83	1.48694	4.05849	7.72883	7.69	Handbook 2017
1-Iodopentane	628-17-1	20	131.5	1.48805	3.02844	5.6481	5.74	Handbook 2017
3-Iodopentane	1809-05-8	20	132.4	1.48446	4.32892	6.91088	6.92	Handbook 2017
1-Iodo-3-methylbutane	541-28-6	19	132.4	1.48446	2.92188	5.61419	5.7	Handbook 2017
2-Iodo-2-methylbutane	594-38-7	20	132.55	1.48771	4.87671	8.49272	8.19	Handbook 2017
1-Iodohexane	638-45-9	20	148.07	1.48571	3.05274	5.20712	5.29	Handbook 2017
1-Iodoheptane	4282-40-0	25	164.64	1.48384	3.03722	4.81274	4.88	Handbook 2017
3-Iodoheptane	31294-92-5	22	165.54	1.481	4.48648	5.83138	5.83	Handbook 2017
1-Iodooctane	629-27-6	20	181.21	1.48232	3.0246	4.58423	4.65	Handbook 2017
1-Iodododecane	4292-19-7	25	247.49	1.47827	3.05265	3.83413	3.88	Handbook 2017
1-Iodohexadecane	544-77-4	20	313.77	1.47594	3.14221	3.46752	3.5	Handbook 2017
N-Formamides
N-Methylformamide	123-39-7	20	65.44	1.40159	75.3591	157.968	182.82	Handbook 2017
N-Ethylformamide	627-45-2	25	82.01	1.41462	50.9994	115.098	112.63	Handbook 2017
N-2-Propylformamide	16741-46-1	25	99.48	1.41934	39.0791	45.1313	65.7	Volume 6 - 73R4
N-Amides
N-Methylacetamide	79-16-3	30	81.79	1.4076	91.4345	185.738	183.27	Handbook 2017
N-Ethylacetamide	625-50-3	20	98.36	1.41748	78.9262	146.842	146.18	Handbook 2017
N-Butylacetamide	1119-49-9	20	131.5	1.42986	79.6785	110.97	111.53	Handbook 2017
N-Methylpropanamide	1187-58-2	20	98.36	1.41748	99.5461	157.277	159.96	Handbook 2017
N-Propylpropanamide	3217-86-5	25	131.5	1.42986	92.1374	106.924	109.68	Handbook 2017
N-(2-Methyl-1-propyl)acetamide	1540-94-9	19	132.4	1.4268	86.5402	108.873	110.68	Volume 6 - 68D1
N-(2-Butyl)acetamide	1189-05-5	24	132.4	1.4268	77.3899	92.6662	98.6	Volume 6 - 68D1
N-Methylpentanoicamide	6225-10-1	26.8	131.5	1.42986	89.4466	120.354	119.28	Volume 6 - 68D1
N-Methyl-2-methylbutanoicamide	21458-37-7	33.8	132.4	1.4268	99.9391	114.497	115.3	Volume 6 - 68D1
N-Methyl-3-methylbutanoicamide	21458-36-6	25.8	132.4	1.4268	90.1509	119.277	118.36	Volume 6 - 68D1
Diamines
1,2-Ethanediamine	107-15-3	20	68.76	1.44779	4.97618	15.6507	14.78	Handbook 2017
Propane-1,2-diamine	78-90-0	25	86.23	1.44656	5.70577	11.115	11.86	Volume 27 - 2011UND2
Dithiols
1,2-Ethanedithiol	540-63-6	20	85.42	1.53563	2.46692	8.39851	7.88	Handbook 2017
1,2-Propanedithiol	814-67-5	20	102.89	1.51922	3.05178	6.27796	6.7	Handbook 2017
1,3-Propanedithiol	109-80-8	30	101.99	1.52428	3.59344	8.07284	8.12	Handbook 2017
Dicarboxylates
Ethylene glycol diacetate	111-55-7	17	134.58	1.41583	5.14704	7.1745	7.04	Handbook 2017
2,3-Diacetoxybutane	22152-23-4	25	169.52	1.42113	3.79095	6.21656	5.84	Volume 6 - 40W2
Ethylene glycol ditetradecanoate	627-84-9	70	532.26	1.45408	4.15531	3.13419	3.08	Handbook 2017
Ethylene glycol dipalmitate	624-03-3	75	598.54	1.45554	4.25275	3.00371	2.96	Handbook 2017
Ethylene glycol distearate	627-83-8	80	664.82	1.4567	4.18414	2.90127	2.86	Handbook 2017
Dimethyl succinate	106-65-0	20	134.58	1.41583	4.77328	7.27451	6.99	Handbook 2017
Diethyl succinate	123-25-1	20	167.72	1.42584	4.70996	6.23274	6	Handbook 2017
Dimethyl glutarate	1119-40-0	20	151.15	1.42137	5.9423	7.15298	7.05	Handbook 2017
Diethyl glutarate	818-38-2	30	184.29	1.42952	5.97494	6.07992	5.99	Handbook 2017
Dinonyl glutarate	5137-27-9	20	416.27	1.45043	5.69887	3.85982	3.81	Volume 6 - 61R1
Dimethyl 1,6-hexanedioate (Dimethyl adipate)	627-93-0	20	167.72	1.42584	5.48093	6.95465	6.86	Handbook 2017
Diethyl hexanedioate (Diethyl adipate)	141-28-6	20	200.86	1.43259	5.58049	6.12226	6.05	Handbook 2017
Diisobutyl hexanedioate (Diisobutyl adipate)	141-04-8	20	268.94	1.43801	5.8581	5.03262	4.98	Handbook 2017
Dicyclohexyl hexanedioate (Dicyclohexyl adipate)	849-99-0	35	296.96	1.48053	5.55374	4.86232	4.81	Handbook 2017
Diethyl nonanedioate (Diethyl azelate)	624-17-9	30	250.57	1.4394	5.53004	5.34959	5.32	Handbook 2017
Diethyl sebacate	110-40-7	30	267.14	1.44111	5.64884	5.15073	5.12	Handbook 2017
Dibutyl sebacate	109-43-3	20	333.42	1.44627	5.77515	4.60238	4.58	Handbook 2017
Dioctyl sebacate (Dioctyl decanedioate)	2432-87-3	26	465.98	1.45222	6.51001	3.8144	3.8	Handbook 2017
Di(2-ethylhexyl) sebacate	122-62-3	25	467.78	1.45037	6.6071	3.80347	3.79	Volume 6 - 75S2
Dibenzyl sebacate	140-24-9	25	357.7	1.53084	5.27704	4.91571	4.89	Volume 6 - 47E1
Dinitrates
1,2-Ethanediol dinitrate (Ethylene glycol dinitrate)	628-96-6	20	99.04	1.42722	15.8945	30.569	29.99	Handbook 2017
1,2-Propanediol dinitrate	6423-43-4	20	116.51	1.42939	17.634	24.9722	25.75	Volume 6 - 42K1
1,3-Propanediol dinitrate	3457-90-7	20	115.61	1.43289	12.0808	26.7305	26.65	Volume 6 - 42K1
1,3-Butanediol dinitrate	6423-44-5	20	133.08	1.43405	13.7881	22.7744	23.35	Volume 6 - 42P1
2,3-Butanediol dinitrate	6423-45-6	20	133.98	1.43099	21.8483	20.6245	22.6	Volume 6 - 42P1
Dinitriles
Butanedinitrile (Succinonitrile)	110-61-2	55	81.1	1.41526	29.4316	29.7462	46.86	Kang Xu 2014 (Handbook : 62,6 à 25°C)
Pentanedinitrile	544-13-8	20	97.67	1.42395	19.7465	46.0847	43.61	Volume 27 - 2013SWI1
Hexanedinitrile	111-69-3	20	114.24	1.43015	21.2657	37.0756	37.51	Volume 27 - 2013SWI1
Heptanedinitrile	646-20-8	20	130.81	1.4348	22.308	31.8841	32.99	Volume 27 - 2013SWI1
Octanedinitrile	629-40-3	20	147.38	1.43841	21.6325	28.3051	29.5	Volume 27 - 2013SWI1
Azelanitrile	1675-69-0	25	163.95	1.4413	21.1148	25.12	26.29	Kang Xu 2014
Sebaconitrile	1871-96-1	25	180.52	1.44366	22.1028	22.8493	24.05	Kang Xu 2014
Ketone + carboxylate
Methyl levulinate	624-45-3	20	128.33	1.41609	10.7778	14.2409	14.91	Volume 27 - 2013LOM2
Ethyl levulinate	539-88-8	20	144.9	1.42185	10.3147	13.2454	13.46	Volume 27 - 2011LOM1
Butyl levulinate	2052-15-5	20	178.04	1.43019	9.74463	11.3032	11.34	Volume 27 - 2011LOM1
Acid + carboxylate
Monomethyl adipate	627-91-8	20	143.67	1.44423	4.40931	6.94818	6.12	Handbook 2017
Monomethyl glutarate	1501-27-5	20	127.1	1.44125	5.20655	7.8396	6.87	Handbook 2017
Dichloroalkanes
1,2-Dichloroethane	107-06-2	20	82.62	1.42073	4.53893	8.62879	8.93	Handbook 2017
1,2-Dichloropropane	78-87-5	20	100.09	1.42438	4.22051	8.60905	8.5	Handbook 2017
1,3-Dichloropropane	142-28-9	30	99.19	1.4284	5.47268	10.317	10.27	Handbook 2017
1,2-Dichlorobutane	616-21-7	20	116.66	1.43039	4.42264	7.59315	7.57	Handbook 2017
1,4-Dichlorobutane	110-56-5	35	115.76	1.4339	5.72818	10.2941	10.24	Handbook 2017
1,2-Dichloro-2-methylpropane	594-37-6	23	116.81	1.43401	4.02244	8.52359	8.25	Handbook 2017
1,2-Dichloropentane	1674-33-5	20	133.23	1.43492	4.32278	6.90702	6.86	Handbook 2017
1,5-Dichloropentane	628-76-2	25	132.33	1.43803	6.78865	10.0703	10.1	Handbook 2017
1,6-Dichlorohexane	2163-00-0	35	148.9	1.44126	6.62632	9.23192	9.24	Handbook 2017
1,7-Dichloroheptane	821-76-1	25	165.47	1.44384	6.83329	8.8703	8.89	Handbook 2017
1,8-Dichlorooctane	2162-99-4	25	182.04	1.44596	6.7191	8.30815	8.32	Handbook 2017
1,10-Dichlorodecane	2162-98-3	35	215.18	1.44922	6.8643	7.15988	7.18	Handbook 2017
Dibromoalkanes
1,2-Dibromoethane	106-93-4	20	88.18	1.5033	1.55084	5.78854	5.72	Handbook 2017
1,2-Dibromopropane	78-75-1	10	105.65	1.49292	1.61816	5.74533	5.67	Handbook 2017
1,3-Dibromopropane	109-64-8	20	104.75	1.49753	4.53426	8.84209	9.02	Handbook 2017
1,2-Dibromobutane	533-98-2	20	122.22	1.48942	2.05749	4.96865	5.02	Handbook 2017
1,3-Dibromobutane	107-80-2	20	122.22	1.48942	5.13205	8.70489	8.91	Handbook 2017
1,4-Dibromobutane	110-52-1	30	121.32	1.49336	4.91267	9.5186	9.62	Handbook 2017
2,3-Dibromobutane	5408-86-6	25	123.12	1.48554	3.24025	5.11132	5.35	Handbook 2017
1,2-Dibromo-2-methylpropane	594-34-3	20	122.37	1.49295	1.56758	5.58132	5.49	Handbook 2017
1,2-Dibromopentane	3234-49-9	25	138.79	1.48675	2.09134	4.53621	4.59	Handbook 2017
1,4-Dibromopentane	626-87-9	20	138.79	1.48675	5.7844	9.78306	9.96	Handbook 2017
1,5-Dibromopentane	111-24-0	30	137.89	1.4902	5.97961	9.38742	9.52	Handbook 2017
1,6-Dibromohexane	629-03-8	25	154.46	1.48772	6.07066	9.10548	9.22	Handbook 2017
3,4-Dibromohexane	16230-28-7	25	156.26	1.48165	4.58483	4.3483	4.59	Handbook 2017
1,2-Dibromoheptane	42474-21-5	25	171.93	1.48298	1.93693	4.02609	4.06	Handbook 2017
2,3-Dibromoheptane	21266-88-6	25	172.83	1.48026	3.38309	4.2143	4.33	Handbook 2017
3,4-Dibromoheptane	21266-90-0	25	172.83	1.48026	2.98022	4.2371	4.33	Handbook 2017
1,8-Dibromooctane	4549-32-0	25	187.6	1.48409	6.24256	8.05869	8.15	Handbook 2017
1,9-Dibromononane	4549-33-1	20	204.17	1.48271	6.37016	7.67704	7.77	Handbook 2017
1,10-Dibromodecane	4101-68-2	30	220.74	1.48155	6.36271	7.05823	7.15	Handbook 2017
Diethers
Ethylene glycol dimethyl ether (Glyme)	110-71-4	24	104.8	1.37132	4.15458	4.41605	5.85	Handbook 2017
Ethylene glycol diethyl ether	629-14-1	20	137.94	1.39379	2.08858	6.1418	5.01	Handbook 2017
Diols
1,2-Ethanediol (Ethylene glycol)	107-21-1	20	56.7	1.41571	13.7362	35.1177	36.15	Handbook 2017
1,2-Propanediol	57-55-6	30	74.17	1.4218	12.0602	27.952	27.25	Handbook 2017
1,3-Propanediol	504-63-2	20	73.27	1.42721	14.7258	35.4604	35.29	Handbook 2017
1,2-Butanediol	584-03-2	25	90.74	1.42999	11.5578	23.8017	23.11	Handbook 2017
1,3-Butanediol	107-88-0	25	90.74	1.42999	15.0444	28.458	28.37	Handbook 2017
1,4-Butanediol	110-63-4	25	89.84	1.43451	16.4563	31.6451	31.79	Handbook 2017
2,3-Butanediol	513-85-9	20	91.64	1.42558	11.0895	23.9264	23.12	Volume 17 - 1996GRI2
1,2-Pentanediol	5343-92-0	24	107.31	1.43568	10.2579	20.6896	19.95	Handbook 2017
1,4-Pentanediol	626-95-9	23	107.31	1.43568	16.2177	26.9323	27.02	Handbook 2017
1,5-Pentanediol	111-29-5	20	106.41	1.43956	15.4932	29.1487	29.08	Handbook 2017
2,3-Pentanediol	42027-23-6	24	108.21	1.43188	10.4429	20.3836	19.69	Handbook 2017
2,4-Pentanediol	625-69-4	21	108.21	1.43188	15.0245	24.4359	24.35	Handbook 2017
3-Methylbutane-1,3-diol	2568-33-4	25	107.46	1.43962	14.8676	24.5614	24.47	Volume 17 - 2004UOS1
2-Methyl-2,4-pentanediol	107-41-5	20	124.93	1.43992	17.9328	21.5154	21.57	Handbook 2017
2-Ethyl-1,3-hexanediol (Ethohexadiol)	94-96-2	20	157.92	1.44292	16.0333	17.4368	17.4	Handbook 2017
Hexane-2,5-diol	2935-44-6	20	124.78	1.43653	15.9135	23.602	23.66	Volume 17 - 1996GRI1
Heptane-1,7-diol	629-30-1	20	139.55	1.44609	17.4645	23.4137	23.61	Volume 17 - 1996GRI1
Alcohols
Methanol	67-56-1	20	41.36	1.32193	9.09524	32.9341	33.33	Handbook 2017
Ethanol	64-17-5	20	57.93	1.36204	9.11993	25.1815	25.49	Handbook 2017
1-Propanol	71-23-8	20	74.5	1.38478	9.23052	20.4568	20.71	Handbook 2017
2-Propanol	67-63-0	20	75.4	1.38011	9.11107	20.1103	20.35	Handbook 2017
1-Butanol	71-36-3	20	91.07	1.39943	9.37383	17.2933	17.51	Handbook 2017
2-Butanol	78-92-2	20	91.97	1.39542	9.19256	17.0539	17.26	Handbook 2017
TEST SET
Borates
Triheptyl borate	2938-83-2	20	413.36	1.43369	0.513077		2.2	Volume 6 - 71M1
Trioctyl borate	2467-12-1	20	463.07	1.43725	0.375914		2.2	Volume 6 - 71M1
Trinonyl borate	2467-14-3	20	512.78	1.44014	0.551422		2.19	Volume 6 - 71M1
Tridecyl borate	20236-81-7	20	562.49	1.44251	0.617679		2.19	Volume 6 - 71M1
Oxysilanes
Ethoxytrimethylsilane	1825-62-3	25	150.42	1.38794	1.36645		2.96	Handbook 2017
1-Butoxy trimethylsilane	1825-65-6	25	183.56	1.40194	1.2315		2.82	Volume 6 - 71N1
Dioxysilanes
Dimethoxydimethylsilane	1112-39-6	25	140.1	1.37984	1.99159		3.45	Handbook 2017
Diethoxydimethylsilane (Dimethyldiethoxysilane)	78-62-6	25	173.24	1.39615	1.80033		3.2	Handbook 2017
Trioxysilanes
Trimethoxymethylsilane	1185-55-3	25	146.35	1.38113	3.35496		4.07	Handbook 2017
Triethoxymethylsilane	2031-67-6	25	196.06	1.40248	2.8838		3.58	Handbook 2017
Tetraoxysilanes
Tetrapentoxysilane	6382-12-3	25	417.72	1.43564	2.56992		2.87	Volume 6 - 69D1
Tetra-2-butoxysilane	5089-76-9	25	355.04	1.4252	1.66412		2.99	Volume 6 - 69D1
Tetra-2-methyl-1-propoxysilane	681-98-1	25	355.04	1.4252	2.26813		2.99	Volume 6 - 69D1
Fluorobenzenes
1-Fluoro-4-(4-pentylcyclohexyl)benzene	76802-61-4	45	257.21	1.49774	2.2597		3.28	Volume 27 - 2009GIL1
Chlorobenzenes
Chloropentamethylbenzene	5153-39-9	20	181.35	1.52358	3.90316		4.15	Volume 6 - 40M1
1-Chloro-2-ethylbenzene	89-96-3	25	132.52	1.53116	1.75813		4.92	Handbook 2017
1-Chloro-3-ethylbenzene	620-16-6	25	132.52	1.53116	2.39044		4.92	Handbook 2017
1-Chloro-4-ethylbenzene	622-98-0	25	132.52	1.53116	2.37528		4.92	Handbook 2017
Bromobenzenes
1-Bromo-2-ethylbenzene	1973-22-4	25	135.3	1.55738	2.57535		4.67	Handbook 2017
1-Bromo-3-ethylbenzene	2725-82-8	25	135.3	1.55738	2.58276		4.67	Handbook 2017
1-Bromo-4-ethylbenzene	1585-07-5	25	135.3	1.55738	2.47882		4.67	Handbook 2017
Primary amines
Isopropylamine	75-31-0	20	81.43	1.39586	2.17152		5.12	Handbook 2017
2-Aminobutane	13952-84-6	20	98	1.40769	2.0364		4.61	Volume 17 - 2004KIN1
1-Amino-2-methylpropane	78-81-9	20	98	1.40769	1.83526		4.61	Volume 17 - 2004KIN1
2-Amino-2-methylpropane	75-64-9	20	98.15	1.41196	1.72244		4.63	Volume 17 - 2004KIN1
Cyclohexylamine	108-91-8	20	112.01	1.46701	1.8545		4.62	Handbook 2017
Benzylamine	100-46-9	20	109.24	1.55343	1.84203		5.28	Handbook 2017
3-Phenylpropylamine	2038-57-5	30	142.38	1.53287	2.31017		4.35	Volume 6 - 77S2
Anilines
2-Ethylaniline	578-54-1	27.8	125.59	1.54554	1.41652		5.25	Volume 17 - 1995JAN1
4-Ethylaniline	589-16-2	25	125.59	1.54554	1.95117		5.28	Handbook 2017
Secondary amines
Di(3-methyl-1-butyl)amine	544-00-3	18	201.26	1.43018	0.753152		2.73	Volume 6 - 05M1
N-Benzyl-methylamine	103-67-3	19	128.75	1.53063	1.70605		3.61	Volume 6 - 11D1
Benzylethylamine	14321-27-8	20	145.32	1.52325	1.88419		3.42	Handbook 2017
Tertiary amines
Triisopentylamine	645-41-0	21	287.2	1.43785	0.541751		2.27	Handbook 2017
N,N-Anilines
N-Ethyl-N-propylaniline	54813-78-4	20	180.65	1.50911	3.07209		3.9	Volume 6 - 52C2
Ethers
Ethyl (2-methyl-2-propyl) ether	637-92-3	25	132.74	1.39341	4.87919		3.58	Volume 6 - 69D1
Didecyl ether	2456-28-2	20	363.67	1.43992	1.66511		2.67	Handbook 2017
Dicyclohexyl ether	4645-15-2	20	194.65	1.47204	1.81962		3.39	Handbook 2017
Benzyl ethyl ether	539-30-0	25	143.83	1.49954	1.65975		3.99	Handbook 2017
Dibenzyl ether	103-50-4	20	189.11	1.57296	1.62025		3.93	Handbook 2017
Cyclic ethers
2-Methyltetrahydrofuran (2-Methyloxolane)	96-47-9	25	99.41	1.40887	3.4907		6.41	Handbook 2017
cis-2,5-dimethyltetrahydrofuran	2144-41-4	22.5	116.88	1.41373	2.60183		5.76	Volume 6 - 76G5
Eucalyptol (Cineole)	470-82-6	25	169.6	1.45311	2.97293		4.71	Handbook 2017
Anisoles
2,6-Dimethylanisole	1004-66-6	20	143.39	1.50584	1.49021		3.71	Handbook 2017
3,5-Dimethylanisole	874-63-5	20	143.39	1.50584	1.42742		3.71	Handbook 2017
Butyl phenyl ether	1126-79-0	20	160.4	1.49617	1.66664		3.5	Handbook 2017
Benzyl phenyl ether	946-80-5	40	172.54	1.58357	1.44752		3.73	Handbook 2017
Thiols
2-Methyl-2-octanethiol	55646-15-6	20	189.33	1.45666	2.63479		3.82	Volume 6 - 77A1
Cyclohexanethiol	1569-69-3	25	120.34	1.4966	2.5152		5.16	Handbook 2017
Benzenemethanethiol	100-53-8	25	117.57	1.57933	1.59714		5.87	Handbook 2017
Benzenepropanethiol	24734-68-7	30	150.71	1.55386	1.91262		4.84	Handbook 2017
Formates
Isobutyl formate (2-Methylpropyl formate)	542-55-2	20	114.56	1.3972	3.62684		6.25	Handbook 2017
Isopentyl formate	110-45-2	15	131.13	1.40586	3.21173		5.8	Handbook 2017
Cyclohexyl formate	4351-54-6	20	128.57	1.44952	3.73712		6.18	Handbook 2017
Benzyl formate	104-57-4	30	125.8	1.52285	3.1932		6.78	Handbook 2017
Carboxylates
Octyl acetate	2051-50-5	15	196.29	1.42528	3.16696		4.1	Volume 6 - 73R2
Tetradecyl acetate	638-59-5	20	295.71	1.43926	2.9969		3.39	Volume 6 - 64B2
Methyl 2-phenylacetate	101-41-7	30	142.15	1.51207	2.72065		5.45	Volume 6 - 65H1
Pentyl 2-phenylacetate	5137-52-0	30	208.43	1.49766	3.15882		4.27	Volume 6 - 65H1
Benzyl 2-phenylacetate	102-16-9	30	204	1.57384	2.66062		4.79	Volume 6 - 65H1
2-Methyl-1-butyl butanoate	539-90-2	19	164.05	1.41453	2.56757		4.45	Volume 6 - 11D1
Methyl decanoate	110-42-9	20	212.86	1.4285	2.78676		3.9	Volume 6 - 64G4
Tetradecyl palmitate	4536-26-9	50	527.69	1.4515	2.56384		2.75	Volume 6 - 52G1
Decyl stearate	32509-55-0	40	494.55	1.45045	2.9309		2.81	Volume 6 - 52G1
Tetradecyl stearate	17661-50-6	50	560.83	1.45243	2.75531		2.71	Volume 6 - 52G1
Cyclohexyl pentanoate	1551-43-5	20	194.63	1.45254	3.05031		4.24	Volume 6 - 64B2
Cyclohexyl hexanoate	6243-10-3	20	211.2	1.45369	3.07091		4.06	Volume 6 - 64B2
Cyclohexyl heptanoate	5454-26-2	20	227.77	1.45467	3.00931		3.91	Volume 6 - 64B2
Cyclohexyl octanoate	1551-42-4	20	244.34	1.45552	2.82088		3.78	Volume 6 - 64B2
Cyclohexyl decanoate	1551-40-2	20	277.48	1.45692	3.19029		3.57	Volume 6 - 64B2
Cyclohexyl laurate	6301-70-8	20	310.62	1.45802	3.14707		3.41	Volume 6 - 64B2
Propyl cyclohexanecarboxylate	6739-34-0	20	178.06	1.45118	2.9361		4.45	Volume 6 - 64B2
Butyl cyclohexanecarboxylate	6553-81-7	20	194.63	1.45254	2.9757		4.24	Volume 6 - 64B2
Pentyl cyclohexanecarboxylate	6553-83-9	20	211.2	1.45369	3.00294		4.06	Volume 6 - 64B2
Hexyl cyclohexanecarboxylate	27948-10-3	20	227.77	1.45467	2.9945		3.91	Volume 6 - 64B2
Heptyl cyclohexanecarboxylate	92319-47-6	20	244.34	1.45552	3.0137		3.78	Volume 6 - 64B2
Octyl cyclohexanecarboxylate	89611-20-1	20	260.91	1.45627	3.00558		3.67	Volume 6 - 64B2
Nonyl cyclohexanecarboxylate	70289-37-1	20	277.48	1.45692	3.00654		3.57	Volume 6 - 64B2
Decyl cyclohexanecarboxylate	93479-48-2	20	294.05	1.4575	3.02355		3.48	Volume 6 - 64B2
Undecyl cyclohexanecarboxylate	94107-44-5	20	310.62	1.45802	3.0428		3.41	Volume 6 - 64B2
Dodecyl cyclohexanecarboxylate	94107-45-6	20	327.19	1.45849	3.02347		3.34	Volume 6 - 64B2
Methyl cis-13-docosenecarboxylate	1120-34-9	20	405.02	1.45611	2.84912		3.08	Volume 6 - 64G4
Phenyl carboxylates
Phenyl hexanoate	7780-16-7	20	191.86	1.50032	2.40871		4.05	Volume 6 - 64B2
Phenyl heptanoate	56052-14-3	20	208.43	1.49766	2.3779		3.88	Volume 6 - 64B2
Phenyl octanoate	5457-78-3	20	225	1.4954	2.32922		3.73	Volume 6 - 64B2
Phenyl decanoate	14353-75-4	20	258.14	1.49176	2.37171		3.51	Volume 6 - 64B2
Benzoates
Heptyl benzoate	7155-12-6	20	225	1.4954	3.41131		4.44	Volume 6 - 64B2
Octyl benzoate	94-50-8	20	241.57	1.49345	3.44576		4.26	Volume 6 - 64B2
Nonyl benzoate	5451-95-6	20	258.14	1.49176	3.47675		4.11	Volume 6 - 64B2
Decyl benzoate	36685-97-9	20	274.71	1.49027	3.45956		3.97	Volume 6 - 64B2
Dodecyl benzoate	2915-72-2	20	307.85	1.48777	3.61434		3.75	Volume 6 - 64B2
Cinnamates
Ethyl cinnamate	4192-77-2	20	168.61	1.5285	3.43316		5.93	Handbook 2017
Propyl cinnamate	74513-58-9	20	185.18	1.5229	3.62824		5.53	Handbook 2017
Pentyl cinnamate	3487-99-8	20	218.32	1.51431	3.65562		4.93	Handbook 2017
Chlorocarboxylates
3-Methyl-1-butyl chlorocarbonate	628-50-2	20	142.64	1.4263	5.49884		8.17	Volume 6 - 11D1
Trichloroacetate
Isobutyl trichloroacetate	33560-15-5	20	167.15	1.46619	5.88135		7.37	Handbook 2017
Isopentyl trichloroacetate	57392-55-9	20	183.72	1.46628	6.05689		6.86	Handbook 2017
Bromocarboxylates
Ethyl 2-bromo-2-methylpropanoate	600-00-0	30	145.57	1.45372	6.19457		8.26	Handbook 2017
Phthalates
Dipentyl phthalate	131-18-0	20	295.63	1.49465	7.09195		5.72	Handbook 2017
Dihexyl phthalate	84-75-3	20	328.77	1.49186	7.20786		5.31	Handbook 2017
Dioctyl phthalate	117-84-0	20	395.05	1.48771	7.80722		4.71	Handbook 2017
Nitrites
tert-Pentyl nitrite	5156-41-2	25	125.47	1.3999	7.61856		8.37	Volume 6 - 63G1
Cyclohexyl nitrite	5156-40-1	25	122.76	1.44182	5.82223		9.04	Volume 6 - 63G1
1-Phenylethyl nitrite	7214-60-0	25	137.46	1.50821	4.60155		9.04	Volume 6 - 63G1
Pyridines
2-Ethylpyridine	100-71-0	20	115.2	1.5038	4.20919		9.33	Handbook 2017
4-Ethylpyridine	536-75-4	20	115.2	1.5038	5.8728		9.33	Handbook 2017
2,4,6-Trimethylpyridine (2,4,6-Collidine)	108-75-8	25	131.33	1.50603	4.47984		8.3	Handbook 2017
Quinolines
6-Methylquinoline	91-62-3	20	133.8	1.59364	4.26872		8.22	Handbook 2017
8-Methylquinoline	611-32-5	20	133.8	1.59364	3.01256		8.22	Handbook 2017
Phosphonates
Dimethyl methylphosphonate	756-79-6	20	114.19	1.39116	15.0826		13.28	Volume 6 - 73K1
Dihexyl octanephosphonate	14576-76-2	25	395.88	1.44489	8.54353		5.19	Volume 6 - 73K1
Diethyl decanephosphonate	16165-68-7	20	296.46	1.43746	8.06856		6.37	Volume 6 - 73K1
Dihexyl decanephosphonate	14580-77-9	20	429.02	1.4466	7.96867		4.99	Volume 6 - 73K1
Diheptyl decanephosphonate	14580-78-0	20	462.16	1.44808	8.64298		4.77	Volume 6 - 73K1
Bis(2-propyl) methanephosphonate	1445-75-6	20	182.27	1.41434	7.96531		9.1	Volume 6 - 73K1
Dimethyl octanephosphonate	6172-97-0	20	230.18	1.429	8.34004		7.66	Volume 6 - 73K1
Alkyl derivatives of urea
N,N-Diethyl-N',N'-dimethyl urea	14216-18-3	25	160.19	1.44856	15.611		17.57	Volume 6 - 58H1
Ioscyanates
Butyl isocyanate	111-36-4	20	111.49	1.4162	7.44085		13.17	Volume 6 - 74Z2
Octadecyl isocyanate	112-96-9	30	343.47	1.45049	7.42548		5.42	Volume 6 - 75Z1
Nitroalkanes
2-Nitrooctane	4609-91-0	20	173.17	1.42775	13.1168		13.58	Volume 6 - 64G2
3-Nitrooctane	4609-92-1	20	173.17	1.42775	15.0255		13.58	Volume 6 - 64G2
4-Nitrooctane	4609-93-2	20	173.17	1.42775	14.8709		13.58	Volume 6 - 64G2
Nitroaromatic compounds
1-Ethyl-2-nitrobenzene	612-22-6	0	134.48	1.53259	13.1393		25.02	Handbook 2017
Nitrates
Pentyl nitrate	1002-16-0	18	128.81	1.41506	5.97838		12.73	Volume 6 - 49M3
Anhydrides
2-Methylpropanoic anhydride (Isobutryic anhydride)	97-72-3	19	163.27	1.42154	12.0529		13.83	Handbook 2017
Aldehydes
2,2-Dimethylpropanal	630-19-3	20	108.46	1.40029	5.22943		11.8	Handbook 2017
Ketones
2-Octanone	111-13-7	20	156.9	1.41716	7.79703		11.23	Handbook 2017
3-Octanone	106-68-3	30	156.9	1.41716	9.0449		10.9	Handbook 2017
2-Nonanone	821-55-6	22	173.47	1.42187	8.21811		10.29	Handbook 2017
5-Nonanone	502-56-7	20	173.47	1.42187	9.70166		10.35	Handbook 2017
2,6-Dimethyl-4-heptanone	108-83-8	20	175.27	1.41736	9.13593		10.19	Handbook 2017
Di-tert-butyl ketone	815-24-7	14	175.57	1.42216	8.98789		10.43	Handbook 2017
2-Decanone	693-54-9	14	190.04	1.42577	7.75128		9.79	Handbook 2017
2-Undecanone	112-12-9	12	206.61	1.42905	8.32141		9.22	Handbook 2017
7-Tridecanone	462-18-0	30	239.75	1.43427	9.12494		7.81	Handbook 2017
9-Heptadecanone	540-08-9	55	306.03	1.44135	7.92196		6.15	Handbook 2017
10-Nonadecanone	504-57-4	80	339.17	1.44386	9.24815		5.45	Handbook 2017
Cyclic ketones
Cyclooctanone	502-49-8	30	134.63	1.46459	10.13		11.87	Volume 27 - 2012SWI2 et 2011JAD2
Cyclotridecanone	832-10-0	30	217.48	1.46561	10.0905		7.94	Volume 6 - 56G2
Thujone	546-80-5	0	162.05	1.4608	8.09949		11	Volume 6 - 40M1
Fenchone	18492-37-0	21	159.82	1.47123	10.2677		10.59	Handbook 2017
2-Cyanooctane	2570-96-9	20	170.45	1.42429	12.7354		13.17	Volume 6 - 64G2
3-Cyanooctane	20469-88-9	20	170.45	1.42429	14.1036		13.17	Volume 6 - 64G2
4-Cyanooctane	20746-51-4	20	170.45	1.42429	13.8281		13.17	Volume 6 - 64G2
Nitriles
Decanenitrile	1975-78-6	25	186.12	1.43021	10.4442		12.09	Volume 17 - 2000HEL1
Undecanenitrile	2244-07-7	25	202.69	1.4332	10.9496		11.26	Volume 17 - 2000HEL1
N,N-Formamides
N,N-Di(1-propyl)formamide	6282-00-4	20	150.48	1.43491	19.6787		22.78	Volume 6 - 70S6
N,N-Di(2-propyl)formamide	2700-30-3	25	152.28	1.42953	21.0576		22	Volume 6 - 73R4
N,N-Amides
N,N-Dimethylpropionamide	758-96-3	20	117.12	1.42099	23.4038		32.62	Volume 6 - 70S6
N,N-Dimethylbutanoicamide	760-79-2	20	133.69	1.42664	22.6145		28.95	Volume 6 - 70S6
N,N-Dimethylpentanoicamide	6225-06-5	20	150.26	1.43107	22.3316		26.05	Volume 6 - 70S6
N,N-Dimethylhexanoicamide	5830-30-8	20	166.83	1.43462	21.0431		23.7	Volume 6 - 70S6
N,N-Di(1-Propyl)acetamide	1116-24-1	20	166.83	1.43462	22.8052		23.7	Volume 6 - 70S6
N,N-Dimethylenanthamide	1115-96-4	20	183.4	1.43754	20.1363		21.76	Volume 6 - 70S6
N,N-Dimethyloctanoylamide	1118-92-9	20	199.97	1.43998	18.8401		20.12	Volume 6 - 70S6
N,N-Dimethylpelargonamide	6225-08-7	20	216.54	1.44205	18.3171		18.73	Volume 6 - 70S6
N,N-Dimethylcaprinamide	14433-76-2	20	233.11	1.44383	16.948		17.54	Volume 6 - 70S6
N,N-Dipentylacetamide	16238-16-7	20	233.11	1.44383	19.6649		17.54	Volume 6 - 70S6
Sulfoxides
Diethyl sulfoxide	70-29-1	20	112.77	1.44135	28.0856		38.62	Volume 17 - 2004GAB1
Diheptyl sulfoxide	25355-20-8	74	278.47	1.45672	21.9832		14.33	Volume 6 - 73B1
Dioctyl sulfoxide	1986-89-6	87	311.61	1.45783	22.8386		12.56	Volume 6 - 73B1
Dinonyl sulfoxide	25355-21-9	86	344.75	1.45874	20.7832		11.53	Volume 6 - 73B1
Sulfones
Methyl-i-propyl sulfone	4853-74-1	25	119.24	1.40932	39.655		41.31	Kang Xu 2014
Ethyl-i-propyl sulfone	4853-75-2	25	135.81	1.41626	44.7156		36.77	Kang Xu 2014
Ethyl-i-butyl sulfone	34008-93-0	25	152.38	1.42172	32.2299		33.14	Kang Xu 2014
i-Propyl-i-butyl sulfone	1222175-72-5	25	168.95	1.42612	41.6137		30.19	Kang Xu 2014
i-Propyl-s-butyl sulfone	1345841-60-2	25	168.95	1.42612	51.7895		30.19	Kang Xu 2014
Butyl-i-butyl sulfone	1222175-70-3	25	185.52	1.42975	27.6514		27.74	Kang Xu 2014
Pyridine-1-oxides
2,6-Dimethylpyridine-1-oxide	1073-23-0	25	119.37	1.52377	28.0891		29.87	Handbook 2017
Phosphine oxides
Dimethyl ethylphosphine oxide	39966-25-1	90	118.26	1.39954	30.0262		42.68	Volume 6 - 74K2
Triheptylphosphine oxide	17262-51-0	50	399.95	1.4469	73.1497		15.99	Volume 6 - 74K2
Phosphine sulfides
Tripropylphosphine sulfide	13639-72-0	20	212.14	1.48127	36.7208		38.03	Volume 6 - 76V1
Tripentylphosphine sulfide	17643-99-1	20	311.56	1.47678	37.934		26.13	Volume 6 - 76V1
Trioctylphosphine sulfide	2551-53-3	20	460.69	1.4737	40.7142		18.02	Volume 6 - 76V1
Tridecylphosphine sulfide	21722-53-2	70	560.11	1.47255	35.2431		13.05	Volume 6 - 76V1
Cyclic carbonates
2,3-Butylene carbonate	4437-70-1	25	104.88	1.4198	35.6306		58.22	Kang Xu 2014
i-Butylene carbonate	4437-69-8	35	104.13	1.42763	23.862		57.4	Kang Xu 2014
Pentylene carbonate	89489-56-5	25	120.55	1.42951	32.4375		51.5	Kang Xu 2014
Sydnones
3-Propylsydnone	6939-15-7	25	112.66	1.45764	59.592		79.47	Volume 17 - 1994SAS1
3-sec-Butylsydnone	3441-44-9	25	130.13	1.4555	56.7216		68.75	Volume 17 - 1994SAS1
3-Propyl-4-ethylsydnone	18358-67-3	25	145.58	1.46278	52.8114		62.21	Volume 17 - 1997HAN1
Carboxylic acids
2,2-Dimethyl pentanoic acid	1185-39-3	23	140.15	1.4343	0.605452		2.74	Volume 6 - 71B1
2-Ethyl-2-methyl hexanoic acid	1185-29-1	23	173.29	1.44055	0.877755		2.63	Volume 6 - 71B1
3-Propyl hexanoic acid	25110-61-6	20	173.14	1.4381	0.450553		2.62	Volume 6 - 64G2
2,3,4-Trimethyl hexanoic acid	35430-56-9	23	174.94	1.43337	1.81317		2.59	Volume 6 - 71B1
2,3,5-Trimethyl hexanoic acid	35430-57-0	23	174.94	1.43337	0.787551		2.59	Volume 6 - 71B1
5,9-Dimethyl decanoic acid	35430-59-2	23	223.75	1.44267	1.61652		2.5	Volume 6 - 71B2
2,2-Dimethylundecanoic acid	13005-29-3	23	239.57	1.44789	1.27136		2.49	Volume 6 - 71B1
2,5,9-Trimethyldecanoic acid	35430-60-5	23	241.22	1.4426	1.81295		2.47	Volume 6 - 71B1
2,9,13,17-Tetramethyloctadecanoic acid	35430-61-6	23	391.25	1.45087	1.92596		2.34	Volume 6 - 71B1
2,5,9,13,17-Pentamethyloctadecanoic acid	35430-62-7	23	408.72	1.45048	2.13873		2.33	Volume 6 - 71B1
cis-13-docosene carboxylic acid	112-86-7	34.6	380.97	1.46511	1.73203		2.39	Volume 6 - 83M1
Docosanoic acid	112-85-6	87.14	387.65	1.45532	0.289107		2.32	Volume 17 - 1996MOG1
Dodecanoic acid	143-07-7	45.29	221.95	1.44646	0.4189		2.49	Volume 17 - 1997MOG1
Phenols
4-Ethylphenol	123-07-9	20	119.56	1.54238	5.43302		7.39	Volume 17 - 1995FAT1
2-Hydroxy-4-(2-propyl)toluene	99-71-8	20	153.6	1.52231	5.24337		6.01	Volume 6 - 74W2
Chloroalkanes
3-Chlorooctane	1117-79-9	20	171.21	1.42558	4.88527		6.1	Volume 6 - 64G2
4-Chlorooctane	999-07-5	20	171.21	1.42558	4.52082		6.1	Volume 6 - 64G2
Chlorocyclohexane	542-18-7	30	118.94	1.4563	4.60685		8.23	Handbook 2017
2-Chlorobornane	464-41-5	95	174.13	1.47528	4.426		5.5	Handbook 2017
(Chloromethyl)benzene	100-44-7	20	116.17	1.53647	3.09513		7.97	Handbook 2017
Bromoalkanes
3-Bromooctane	999-64-4	20	173.99	1.44603	4.67873		6.18	Volume 6 - 64G2
4-Bromooctane	999-06-4	20	173.99	1.44603	4.54076		6.18	Volume 6 - 64G2
3-(Bromomethyl)heptane	18908-66-2	25	173.99	1.44603	4.67222		5.01	Volume 6 - 75S2
1-Bromodocosane	6938-66-5	42.7	405.07	1.45921	3.51607		3.22	Volume 6 - 49H1
Bromocyclohexane	108-85-0	30	121.72	1.48557	4.51351		8.38	Handbook 2017
(Bromomethyl)benzene	100-39-0	20	118.95	1.56633	2.87621		7.83	Handbook 2017
(3-Bromopropyl)benzene	637-59-2	29	152.09	1.54411	2.89897		6.22	Handbook 2017
Iodoalkanes
2-Iodooctane	557-36-8	20	182.11	1.47975	3.94284		5.48	Volume 6 - 64G2
3-Iodooctane	1117-80-2	20	182.11	1.47975	3.67227		5.48	Volume 6 - 64G2
4-Iodooctane	1117-32-4	20	182.11	1.47975	3.87808		5.48	Volume 6 - 64G2
1-Iodohexadecane	544-77-4	20	313.77	1.47594	3.14221		3.5	Volume 6 - 88M1
N-Amides
N-Ethylpropionamide	5129-72-6	25	114.93	1.42455	87.1709		124.4	Volume 6 - 58V1
N-Propylacetamide	5331-48-6	25	114.93	1.42455	80.9321		124.4	Volume 6 - 58V1
N-Ethylbutanoicamide	13091-16-2	25	131.5	1.42986	83.3992		109.68	Volume 6 - 58V1
N-(1-Propyl)butanoicamide	5129-73-7	40	148.07	1.43399	83.0564		93.45	Volume 6 - 58V1
N-(1-Butyl)propionicamide	2955-67-1	25	148.07	1.43399	87.7148		98.1	Volume 6 - 58V1
N-(1-Pentyl)acetamide	2524-60-9	25	148.07	1.43399	78.2847		98.1	Volume 6 - 58V1
Polyfunctional compounds
1-Bromo-2-chloroethane	107-04-0	10	85.4	1.46274	2.79488		7.55	Handbook 2017
3-Bromo-1-chloro-2-methylpropane	6974-77-2	30	119.44	1.46027	5.27684		8.34	Volume 6 - 78S2
1-Bromo-2-ethoxypentane	98429-70-0	25	163.67	1.44252	4.88244		4.19	Volume 6 - 34S1
2-Bromo-3-ethoxypentane	854259-62-4	25	164.57	1.43997	4.88181		4.46	Volume 6 - 34S1
3-Bromo-2-ethoxypentane	855751-65-4	25	164.57	1.43997	6.74138		4.46	Volume 6 - 34S1
Methyl 3-bromopropanoate	3395-91-3	30	111.38	1.44979	2.88571		6.36	Handbook 2017
Methyl 4-chlorobutanoate	3153-37-5	30	125.17	1.42415	6.35826		8.2	Handbook 2017
Ethyl 3-chloropropanoate	623-71-2	30	125.17	1.42415	6.89155		6.78	Handbook 2017
2-Ethoxyethyl acetate	111-15-9	30	136.26	1.40463	5.43682		5.82	Handbook 2017
2-Methoxyethyl stearate	111-09-1	50	384.81	1.44477	4.15571		3.29	Volume 6 - 45P2
Levulinic acid	123-76-2	25	104.28	1.43902	11.0486		17.92	Volume 27 - 2011LOM1
3-Methoxypropionitrile	110-67-8	25	92.95	1.39033	20.5812		24.94	Kang Xu 2014
1,2,3-Trichloropropane	96-18-4	20	111.82	1.45415	3.90709		12.31	Handbook 2017
1,2,3-Tribromopropane	96-11-7	30	120.16	1.54517	2.69141		8.6	Handbook 2017
Dichloroethyl ether	111-44-4	20	122.01	1.43269	14.3567		10.9	Handbook 2017
Bis(3-chloro-1-propyl) ether	629-36-7	20	155.15	1.44	7.96598		10.21	Volume 6 - 51T2
Trinitroglycerol (Nitroglycerin)	55-63-0	20	136.45	1.45527	14.0022		34.12	Handbook 2017
Clonitrate (3-Chloro-1,2-propanediol dinitrate)	2612-33-1	20	128.24	1.45494	11.883		27.67	Handbook 2017
1,3-Dichloro-2-propanyl nitrate	21981-53-3	20	120.03	1.45457	8.22214		20.35	Volume 6 - 42K1
Tris(1-butyl) tricarballate	38094-11-0	20	338.89	1.44913	8.27401		5.18	Volume 6 - 61R1
Tris(3-methyl-1-butyl) tricarballate	5333-56-2	20	391.3	1.44813	8.12431		4.72	Volume 6 - 61R1
Tricaprin	621-71-6	40	587.44	1.45677	6.29903		3.69	Volume 6 - 67G4
Trilinolein	537-40-6	20	945.04	1.48515	8.57009		3.25	Volume 6 - 67G4
Glycerol triacetate (Triacetin)	102-76-1	20	189.76	1.43504	6.41015		7.79	Handbook 2017
Tributyrin	60-01-5	10	289.18	1.44603	6.89618		5.89	Handbook 2017
Glycerol trihexanoate (1,2,3-Propanetriyl hexanoate)	621-70-5	20	388.6	1.45144	6.50246		4.76	Handbook 2017
Glycerol trioctanoate (1,2,3-Propanetriyl octanoate)	538-23-8	20	488.02	1.45465	6.38475		4.19	Handbook 2017
Glycerol trilaurate (Trilaurin)	538-24-9	40	686.86	1.45829	6.38527		3.45	Handbook 2017
Glycerol tripalmitate (Tripalmitin)	555-44-2	55	885.7	1.4603	5.86687		3.09	Handbook 2017
Glycerol trielaidate (Trielaidin)	537-39-3	40	965.08	1.47277	6.31572		3.1	Handbook 2017
Glycerol trioleate (Triolein)	122-32-7	20	965.08	1.47277	6.78363		3.17	Handbook 2017
Glycerol tristearate (Tristearin)	555-43-1	80	985.12	1.461	5.62275		2.92	Handbook 2017
Diethylene glycol dimethyl ether (Diglyme)	111-96-6	25	144.19	1.39451	5.44028		6.6	Handbook 2017
Triethylene glycol dimethyl ether (Triglyme)	112-49-2	25	183.58	1.40791	7.22136		7.06	Handbook 2017
Tetraethylene glycol dimethyl ether	143-24-8	25	222.97	1.41665	8.72196		7.38	Handbook 2017
Tetraethylene glycol di-1-butyl ether	112-98-1	25	322.39	1.43206	7.14885		5.71	Volume 6 - 58H1
Ethanolamine (Glycinol)	141-43-5	20	62.73	1.4332	11.3342		24.66	Handbook 2017
2-Amino-2-methylpropan-1-ol	124-68-5	30	96.92	1.4449	11.2255		16.16	Volume 27 - 2007HSI1
2-Chloroethanol (Ethylene chlorohydrin)	107-07-3	20	69.66	1.41869	10.2935		20	Handbook 2017
6-Chloro-1-hexanol	2009-83-8	-31	135.94	1.44216	13.2876		20.38	Handbook 2017
2-Methoxyethanol (Ethylene glycol monomethyl ether)	109-86-4	25	80.75	1.38675	8.28665		15.76	Handbook 2017
2-Ethoxyethanol (Ethylene glycol monoethyl ether)	110-80-5	25	97.32	1.40014	7.4458		13.53	Handbook 2017
2-Propoxyethanol	2807-30-9	20	113.89	1.40971	7.30903		12.09	Volume 27 - 2012KIN1 et 2008CWI1
2-Butoxyethanol	111-76-2	25	130.46	1.41689	6.42583		10.67	Volume 6 - 58H1
2-Isopropoxyethanol	109-59-1	25	114.79	1.40639	6.80365		11.77	Volume 17 - 1996KAA1
2-Isobutoxyethanol	4439-24-1	25	131.36	1.41393	6.3293		10.56	Volume 17 - 1996KAA1
1-Propoxypropan-2-ol	1569-01-3	25	131.36	1.41393	5.99206		10.56	Volume 27 - 2012IGL1
2-tert-Butoxyethanol	7580-85-0	25	131.51	1.41712	6.11791		10.6	Volume 27 - 2012IGL1
Propylene glycol monobutyl ether	29387-86-8	20	147.93	1.4198	6.12313		9.75	Volume 17 - 2005KIN2
Octadecaoxy ethanol	2136-72-3	55	362.44	1.44892	4.39568		4.76	Volume 6 - 71P1
Octadecaoxy propanol	17367-36-1	55	379.01	1.44972	5.43071		5.2	Volume 6 - 71P1
Eicosanoxyethanol	2136-73-4	65	395.58	1.45045	4.36468		4.44	Volume 6 - 71P1
Docosanoxyethanol	2136-74-5	65	428.72	1.45175	4.33706		4.25	Volume 6 - 71P1
Docosanoxypropanol	23377-41-5	65	445.29	1.45232	5.19593		4.63	Volume 6 - 71P1
Eicosanoxypropanol	24543-86-0	60	413.05	1.45008	5.28774		4.37	Volume 6 - 71P1
Ethylene glycol monoacetate	542-59-6	30	95.64	1.41579	7.00186		15.07	Handbook 2017
cis-Ethyl ricinoleate	75557-20-9	100	354.98	1.46266	4.43447		6.21	Volume 6 - 59L3
trans-Ethyl ricinoleate	108392-05-8	100	354.98	1.46266	5.32894		6.21	Volume 6 - 59L3
(3-Methyl-1-propyl) ricinolate	3645-96-3	21	389.02	1.46191	6.9058		6.92	Volume 6 - 24W1
Diacetone alcohol (4-Hydroxy-4-methyl-2-pentanone)	123-42-2	25	123.58	1.42994	12.6197		20.43	Handbook 2017
3-Hydroxypropanoic acid (Hydracrylic acid)	503-66-2	23	71.59	1.44922	11.9587		20.46	Handbook 2017
3-Hydroxybutanoic acid	625-71-8	23	89.06	1.44775	15.6854		16.66	Handbook 2017
cis-Ricinoleic acid	141-22-0	100	314.36	1.47389	3.97325		5.98	Volume 6 - 59L3
trans-Ricinoleic acid	540-12-5	100	314.36	1.47389	3.90222		5.98	Volume 6 - 59L3
2-Methyl-3-hydroxynonanonic acid	35781-43-2	23	189.38	1.45569	6.61001		8.68	Volume 6 - 71B1
3-Hydroxy-2-methyl decanoic acid	64192-83-2	23	205.95	1.45662	4.75113		8.12	Volume 6 - 71B2
3,5,9-Trimethyl-3-hydroxydecanoic acid	666830-25-7	23	240.14	1.45804	10.192		7.2	Volume 6 - 71B1
Glycerol 1,3-diacetate (1,3-Diacetin)	105-70-4	15	150.82	1.44002	7.34779		13.82	Handbook 2017
1,2,3-Propanetriol 1,2-diacetate	102-62-5	-28.5	150.82	1.44002	12.4166		16.83	Volume 6 - 80I1
1,2,3-Propanetriol 1,3-dipalmitate	502-52-3	72	614.78	1.46053	7.37108		4.26	Volume 6 - 50C4
1,2,3-Propanetriol 1,3-distearate	504-40-5	78	681.06	1.46119	7.19254		4	Volume 6 - 50C4
1,2,3-Propanetriol distearate	1323-83-7	80	681.06	1.46119	6.84185		4.1	Volume 6 - 52G1
2-(2-methoxyethoxy)ethanol	111-77-3	25	120.14	1.40975	11.2719		15.33	Volume 27 - 2011JOS1
2-(2-ethoxyethoxy)ethanol	111-90-0	25	136.71	1.4166	10.2107		13.76	Volume 17 - 1994KAA1
2-(2-Butoxyethoxy)ethanol	112-34-5	25	169.85	1.42634	9.93455		11.48	Volume 17 - 1994MAC1
Dipropylene glycol monomethyl ether	34590-94-8	20	155.08	1.41689	8.89487		12.47	Volume 17 - 2005KIN2
2-(2-hexyloxyethoxy)ethanol	112-59-4	25	202.99	1.43294	8.49145		9.93	Volume 17 - 1994KAA1
Dipropylene glycol monobutyl ether	35884-42-5	20	204.79	1.42895	7.74579		9.94	Volume 17 - 2005KIN2
2-(2-(Docosyloxy)ethoxy)ethanol	24897-44-7	63.3	468.11	1.45228	8.35686		4.94	Volume 27 - 2008PIT1
Tri(ethylene glycol) monobutyl ether	143-22-6	25	209.24	1.43226	10.6838		11.47	Volume 17 - 1994KAA1
Triethylene glycol monooctadecyl ether	4439-32-1	63.3	441.22	1.45056	9.79765		5.85	Volume 27 - 2008PIT1
3-Chloro-1,2-propanediol (alpha-Chlorohydrin)	96-24-2	20	85.9	1.46097	14.4452		32.1	Handbook 2017
Glycerol 1-acetate (1,2,3-Propanetriol-1-acetate)	106-61-6	-31	111.88	1.44851	19.8456		29.64	Handbook 2017
Monopalmitin	26657-96-5	67.1	343.86	1.46114	8.64219		8.32	Volume 6 - 50C3
Bis(2-hydroxy-1-propyl) ether	25265-71-8	20	131.03	1.43527	14.7279		22.27	Volume 6 - 71I1
Diethylene glycol (Diglycol)	111-46-6	20	96.09	1.43293	17.3009		29.83	Handbook 2017
Triethylene glycol (Triglycol)	112-27-6	20	135.48	1.4402	17.728		25.35	Handbook 2017
Tetraethylene glycol (Tetraglycol)	112-60-7	20	174.87	1.44421	19.4538		22.33	Handbook 2017
Pentaethylene glycol	4792-15-8	20	214.26	1.44675	20.9213		20.22	Volume 6 - 56K1
Hexaethylene glycol	2615-15-8	20	253.65	1.44851	21.5373		18.67	Volume 6 - 56K1
Heptaethylene glycol	5617-32-3	20	293.04	1.44979	22.8867		17.5	Volume 6 - 56K1
Glycerol (1,2,3-Propanetriol)	56-81-5	20	72.94	1.46623	18.514		48.58	Handbook 2017
1,2,6-Hexanetriol (1,2,6-Trihydroxyhexane)	106-69-4	12	122.65	1.46665	20.2298		36.39	Handbook 2017
Xylitol (Xylite)	87-99-0	20	105.42	1.52273	21.0975		66.57	Handbook 2017
D-Glucitol (Sorbitol)	50-70-4	80	121.66	1.54015	25.2694		60.97	Handbook 2017
Glucoheptitol	1069-00-7	20	137.9	1.55362	17.7769		78.71	Volume 6 - 34G1
Monoalcohols
2-Methyl-1-propanol	78-83-1	20	91.97	1.39542	9.57563		17.26	Handbook 2017
2-Methyl-2-propanol	75-65-0	25	92.12	1.39996	6.52051		17.07	Handbook 2017
2-Methyl-1-butanol	137-32-6	25	108.54	1.40616	9.75221		14.8	Handbook 2017
3-Methyl-1-butanol	123-51-3	20	108.54	1.40616	9.58866		15.03	Handbook 2017
2-Methyl-2-butanol	75-85-4	25	108.69	1.41001	2.9734		14.86	Handbook 2017
3-Methyl-2-butanol	598-75-4	25	109.44	1.40272	7.45775		14.62	Handbook 2017
2,2-Dimethyl-1-propanol	75-84-3	60	108.69	1.41001	5.32253		13.43	Handbook 2017
2-Methyl-1-pentanol	105-30-6	25	125.11	1.4141	9.01678		13.15	Volume 17 - 1998UOS2
3-Methyl-1-pentanol	589-35-5	25	125.11	1.4141	10.7727		13.15	Handbook 2017
3-Methyl-3-pentanol	77-74-7	20	125.26	1.41745	2.13676		13.4	Handbook 2017
2,2-Dimethyl-1-butanol	1185-33-7	20	125.26	1.41745	6.97941		13.4	Handbook 2017
3-Methyl-2-(2-propyl)-1-butanol	18593-92-5	25	160.05	1.42009	8.36767		10.66	Volume 6 - 58W1
2-Ethyl-1-butanol	97-95-0	89	125.11	1.4141	4.52689		11.06	Handbook 2017
2-Methyl-1-hexanol	624-22-6	25	141.68	1.42022	8.12432		11.87	Volume 17 - 1998UOS2
2-Methyl-2-hexanol	625-23-0	24	141.83	1.42318	1.38199		11.94	Handbook 2017
3-Methyl-2-hexanol	2313-65-7	24	142.58	1.41746	3.09964		11.79	Handbook 2017
3-Methyl-3-hexanol	597-96-6	25	141.83	1.42318	1.37642		11.91	Handbook 2017
3-Ethyl-3-pentanol	597-49-9	20	141.83	1.42318	1.26235		12.09	Handbook 2017
2,2-Dimethyl-1-pentanol	2370-12-9	20	141.83	1.42318	3.93205		12.09	Handbook 2017
2-(2-propyl)-1-pentanol	111675-50-4	25	158.25	1.42507	6.90629		10.84	Volume 6 - 58W1
2-Methyl-1-heptanol	60435-70-3	20	158.25	1.42507	3.51147		11	Handbook 2017
3-Methyl-1-heptanol	1070-32-2	17	158.25	1.42507	1.06595		11.1	Handbook 2017
4-Methyl-1-heptanol	817-91-4	17	158.25	1.42507	2.94121		11.1	Handbook 2017
5-Methyl-1-heptanol	7212-53-5	17	158.25	1.42507	5.93593		11.1	Handbook 2017
6-Methyl-1-heptanol	1653-40-3	17	158.25	1.42507	8.6578		11.1	Handbook 2017
2-Methyl-2-heptanol	625-25-2	19	158.4	1.42773	1.68203		11.07	Handbook 2017
3-Methyl-2-heptanol	31367-46-1	16	159.15	1.42256	5.77233		11.04	Handbook 2017
4-Methyl-2-heptanol	56298-90-9	17	159.15	1.42256	1.88059		11.01	Handbook 2017
5-Methyl-2-heptanol	54630-50-1	5	159.15	1.42256	5.58065		11.43	Handbook 2017
6-Methyl-2-heptanol	4730-22-7	17	159.15	1.42256	4.75698		11.01	Handbook 2017
2-Methyl-3-heptanol	18720-62-2	20	159.15	1.42256	1.53311		10.91	Handbook 2017
3-Methyl-3-heptanol	5582-82-1	20	158.4	1.42773	1.21606		11.04	Handbook 2017
4-Methyl-3-heptanol	14979-39-6	20	159.15	1.42256	1.5894		10.91	Handbook 2017
5-Methyl-3-heptanol	18720-65-5	20	159.15	1.42256	2.16098		10.91	Handbook 2017
6-Methyl-3-heptanol	18720-66-6	20	159.15	1.42256	3.37634		10.91	Handbook 2017
2-Methyl-4-heptanol	21570-35-4	23	159.15	1.42256	1.63966		10.81	Handbook 2017
3-Methyl-4-heptanol	1838-73-9	17	159.15	1.42256	5.78258		11.01	Handbook 2017
4-Methyl-4-heptanol	598-01-6	23	158.4	1.42773	1.09987		10.94	Handbook 2017
2,2-Dimethyl-1-hexanol	2370-13-0	20	158.4	1.42773	2.82292		11.04	Handbook 2017
2-Ethyl-1-hexanol	104-76-7	25	158.25	1.42507	6.00086		10.84	Handbook 2017
2,2-Dimethyl-1-octanol	2370-14-1	20	191.54	1.43449	7.34837		9.46	Handbook 2017
2-Butyl-1-octanol	3913-02-8	90	224.53	1.43739	2.5852		7.01	Handbook 2017
2,2-Dimethyl-1-decanol	2370-15-2	20	224.68	1.43928	2.05906		8.34	Volume 6 - 65D1
1-Pentanol	71-41-0	25	107.64	1.40967	9.28514		14.99	Handbook 2017
2-Pentanol	6032-29-7	25	108.54	1.40616	8.45056		14.8	Handbook 2017
3-Pentanol	584-02-1	25	108.54	1.40616	8.20613		14.8	Handbook 2017
1-Hexanol	111-27-3	20	124.21	1.41721	8.83413		13.5	Handbook 2017
2-Hexanol	626-93-7	25	125.11	1.4141	7.56486		13.15	Handbook 2017
3-Hexanol	623-37-0	25	125.11	1.4141	6.47279		13.15	Handbook 2017
1-Heptanol	111-70-6	20	140.78	1.42301	8.83668		12.17	Handbook 2017
2-Heptanol	543-49-7	21	141.68	1.42022	7.21105		12.01	Handbook 2017
3-Heptanol	589-82-2	23	141.68	1.42022	4.93025		11.94	Handbook 2017
4-Heptanol	589-55-9	23	141.68	1.42022	4.1349		11.94	Handbook 2017
1-Octanol	111-87-5	20	157.35	1.42761	8.43448		11.1	Handbook 2017
2-Octanol	123-96-6	20	158.25	1.42507	6.43319		11	Handbook 2017
3-Octanol	589-98-0	20	158.25	1.42507	3.90349		11	Handbook 2017
4-Octanol	589-62-8	20	158.25	1.42507	2.81699		11	Handbook 2017
1-Nonanol	143-08-8	20	173.92	1.43134	7.72993		10.23	Handbook 2017
2-Nonanol	628-99-9	25	174.82	1.42901	5.5796		10	Handbook 2017
3-Nonanol	624-51-1	25	174.82	1.42901	3.14771		10	Handbook 2017
4-Nonanol	5932-79-6	25	174.82	1.42901	2.20413		10	Handbook 2017
5-Nonanol	623-93-8	25	174.82	1.42901	2.0219		10	Handbook 2017
1-Decanol	112-30-1	20	190.49	1.43443	7.3895		9.5	Handbook 2017
2-Decanol	1120-06-5	25	191.39	1.43229	5.0606		9.3	Handbook 2017
3-Decanol	1565-81-7	25	191.39	1.43229	2.8595		9.3	Handbook 2017
4-Decanol	2051-31-2	25	191.39	1.43229	2.031		9.3	Handbook 2017
5-Decanol	5205-34-5	25	191.39	1.43229	1.78648		9.3	Handbook 2017
1-Undecanol	112-42-5	40	207.06	1.43703	5.91577		8.42	Handbook 2017
1-Dodecanol	112-53-8	30	223.63	1.43925	5.93041		8.14	Handbook 2017
1-Tridecanol	112-70-9	60	240.2	1.44116	3.8656		7.15	Handbook 2017
1-Tetradecanol	112-72-1	45	256.77	1.44283	4.65163		7.06	Handbook 2017
1-Pentadecanol	629-76-5	60	273.34	1.4443	3.70591		6.51	Handbook 2017
1-Hexadecanol	36653-82-4	60	289.91	1.4456	3.89374		6.24	Handbook 2017
1-Heptadecanol	1454-85-9	60	306.48	1.44677	3.4444		6	Handbook 2017
1-Octadecanol	112-92-5	60	323.05	1.44781	3.54294		5.79	Handbook 2017
1-Eicosanol	629-96-9	65	356.19	1.44961	3.23067		5.37	Handbook 2017
1-Docosanol	661-19-8	75	389.33	1.4511	2.992		4.98	Handbook 2017
Cyclopentanol	96-41-3	15	91.93	1.44338	9.04713		18.77	Handbook 2017
1-Methylcyclopentanol	1462-03-9	37	108.65	1.45092	3.77297		15.19	Handbook 2017
Cyclohexanol	108-93-0	20	105.98	1.45932	9.09165		16.56	Handbook 2017
cis-2-Methylcyclohexanol	7443-70-1	20	123.45	1.45682	5.64982		14.36	Handbook 2017
cis-3-Methylcyclohexanol	5454-79-5	20	123.45	1.45682	8.78763		14.36	Handbook 2017
cis-4-Methylcyclohexanol	7731-28-4	20	123.45	1.45682	8.54696		14.36	Handbook 2017
Cycloheptanol	502-41-0	20	119.41	1.47452	8.0739		15.17	Volume 17 - 2002HAN1
Cyclohexanemethanol	100-49-2	60	122.55	1.4604	6.59332		12.95	Handbook 2017
Menthol (2-Isopropyl-5-methylcyclohexanol)	1490-04-6	36	174.96	1.45478	2.37702		10.05	Handbook 2017
Benzyl alcohol (Benzenemethanol)	100-51-6	30	103.21	1.55021	5.55199		18.7	Handbook 2017
Benzeneethanol	60-12-8	20	119.78	1.53842	6.59088		16.55	Handbook 2017
α-Methylbenzenemethanol (1-Phenylethanol)	98-85-1	20	120.68	1.53395	4.46214		16.34	Handbook 2017
α,α-Dimethylbenzenemethanol (2-Phenyl-2-propanol)	617-94-7	30	137.4	1.52891	2.87477		14	Handbook 2017
Benzenepropanol	122-97-4	20	136.35	1.52957	7.36853		14.54	Handbook 2017
1-Phenyl-2-propanol	698-87-3	20	137.25	1.52572	5.57032		14.38	Handbook 2017
α-Ethylbenzenemethanol	93-54-9	20	137.25	1.52572	3.60511		14.38	Handbook 2017
1-Phenyl-2-methyl-2-propanol	100-86-7	25	153.97	1.52214	3.30169		12.73	Handbook 2017
1,2,3,4-Tetrahydro-2-naphthol (Tetralol)	530-91-6	20	134.47	1.57744	6.54893		15.74	Handbook 2017
9-Octadecene-1-ol	143-28-2	22	316.37	1.45938	3.9483		6.52	Volume 6 - 74B5
1-Phenyl-1-dodecanol	1851-93-0	60	286.38	1.49497	2.49071		6.75	Volume 6 - 64B3
1-Phenyl-1-tridecanol	1851-92-9	60	302.95	1.49344	2.42166		6.46	Volume 6 - 64B3
1-Phenyl-1-tetradecanol	1851-99-6	60	319.52	1.49207	2.32402		6.21	Volume 6 - 64B3
1-Phenyl-1-pentadecanol	1851-98-5	60	336.09	1.49083	2.35408		5.98	Volume 6 - 64B3
1-Phenyl-1-hexadecanol	1851-97-4	60	352.66	1.48972	2.31795		5.78	Volume 6 - 64B3
1-Phenyl-1-heptadecanol	1851-96-3	60	369.23	1.4887	2.38094		5.59	Volume 6 - 64B3
1-Phenyl 1-octadecanol	3750-33-2	60	385.8	1.48778	2.34698		5.42	Volume 6 - 64B3
1-Phenyl-1-nonadecanol	1851-95-2	60	402.37	1.48693	2.29853		5.27	Volume 6 - 64B3
Miscellaneous data measured at temperatures beyond the scope of the present model
2-Iodo-2-methylpropane	558-17-8	10	115.98	1.49066	3.1264		9.43888	Handbook 2017
Ethane	74-84-0	-178	59.16	1.31237	0.041115		1.72	Handbook 2017
Propene	115-07-1	-53	69.98	1.36847	0.127979		1.87	Handbook 2017
1-Butene	106-98-9	-53	86.55	1.38686	0.172522		1.92	Handbook 2017
1,3-Cyclohexadiene	592-57-4	-89	92.95	1.51001	0.17489		2.28	Handbook 2017
Acetylene	74-86-2	-78	45.54	1.3249	0.204092		1.76	Handbook 2017
Hexamethylbenzene	87-85-4	176	186.19	1.50603	-0.220585		2.27	Handbook 2017
Anthracene	120-12-7	229	158.43	1.66048	-0.18988		2.76	Handbook 2017
Phenanthrene	85-01-8	110	158.43	1.66048	-0.04935		2.76	Handbook 2017
Methylamine	74-89-5	-58	47.39	1.35545	3.56565		9.45	Handbook 2017
4-Cyclohexylphenol	1131-60-8	131	167.61	1.55492	2.88013		4.87	Handbook 2017
1,2,3,4-Butanetetrol	149-32-6	120	89.18	1.49934	17.2184		43.94	Handbook 2017
D-Mannitol	69-65-8	170	121.66	1.54015	21.5809		48.85	Handbook 2017
Methyl nitrite	624-91-9	-73	58.14	1.32599	5.3696		21.69	Handbook 2017
Dimethyl sulfone	67-71-0	110	85.2	1.39182	32.0834		43.8	Handbook 2017
Fluoromethane	593-53-3	-142	47.21	1.22671	8.31358		10.17	Handbook 2017
1-Chloro-2-propanol	127-00-4	-120	87.13	1.42328	15.6698		30.18	Handbook 2017
3-Chloro-1-propanol	627-30-5	-58	86.23	1.42789	13.0432		28.25	Handbook 2017
	Codes for references :
	"Volume 6", "Volume 17" and "Volume 27" refer to Supplements to Volume IV of C. Wöhlfarth, "Static Dielectric Constants of Pure Liquids and Binary Liquid Mixtures", Springer-Verlag, Berlin Heidelberg, 2008
	"Handbook 2017": Data compiled by the same author in: "Permittivity (dielectric constant) of liquids, in: W. M. Haynes (ed.), Handbook of Chemistry and Physics, CRC Press, Boca Raton, 2017
	"Kang Xu 2014": Data from K. Xu, Chemical Reviews, 104, 4303-4418 (2004)
